# 1        **Magnetotactic bacteria accumulate a large pool of iron distinct** 2                                    **from their magnetite crystals**

3  
4     Matthieu Amor<sup>1\*</sup>, Alejandro Ceballos<sup>2</sup>, Juan Wan<sup>1</sup>, Christian P. Simon<sup>3</sup>, Allegra T. Aron<sup>4,5,6</sup>,  
5                                    Christopher J. Chang<sup>4,7</sup>, Frances Hellman<sup>2,3,8</sup>, Arash Komeili<sup>1,7</sup>

6  
7        <sup>1</sup> Department of Plant and Microbial Biology, University of California, Berkeley, CA 94720-3102

8        <sup>2</sup> Department of Materials Science and Engineering, University of California, Berkeley, California  
9                                    94720

10        <sup>3</sup> Department of Physics, University of California, Berkeley, California 94720

11        <sup>4</sup> Department of Chemistry, University of California, Berkeley, CA 94720

12        <sup>5</sup> Skaggs School of Pharmacy and Pharmaceutical Sciences, University of California, San Diego, La  
13                                    Jolla, CA 92093, USA

14        <sup>6</sup> Collaborative Mass Spectrometry Innovation Center, University of California, San Diego, La Jolla,  
15                                    CA 92093, USA

16        <sup>7</sup> Department of Molecular and Cell Biology, University of California, Berkeley, CA 94720-3200

17        <sup>8</sup> Materials Sciences Division, Lawrence Berkeley National Laboratory, Berkeley, California 94720

18  
19  
20        \* Present address: CNRS, CEA, Aix-Marseille Université, UMR7265 Biosciences and  
21                                    Biotechnologies Institute of Aix-Marseille, Saint Paul lez Durance, France.

22        Corresponding authors: [matthieu.amor@cea.fr](mailto:matthieu.amor@cea.fr) (MA); [komeili@berkeley.edu](mailto:komeili@berkeley.edu) (AK)

23

## 24 **Abstract**

25 Magnetotactic bacteria (MTB) are ubiquitous aquatic microorganisms that form intracellular  
26 nanoparticles of magnetite ( $\text{Fe}_3\text{O}_4$ ) or greigite ( $\text{Fe}_3\text{S}_4$ ) in a genetically controlled manner.  
27 Magnetite and greigite synthesis requires MTB to transport a large amount of iron from the  
28 environment which is subsequently concentrated in organelles called magnetosomes for  
29 crystal precipitation and maturation. X-ray absorption analysis of MTB suggests that the  
30 intracellular iron is mainly contained within the crystals, thus preventing potential toxic  
31 effects of free iron. In contrast, recent mass spectrometry studies suggest that MTB may  
32 contain a large amount of iron that is not precipitated in crystals. Here, we attempt to resolve  
33 these discrepancies by performing chemical and magnetic assays to quantify the different iron  
34 pools in the magnetite-forming strain *Magnetospirillum magneticum* AMB-1 cultivated at  
35 varying iron concentrations. AMB-1 mutants showing defects in crystal precipitation were  
36 also characterized following the same approach. All results show that magnetite represents at  
37 most 30 % of the total intracellular iron under our experimental conditions. We further  
38 examined the iron speciation and subcellular localization in AMB-1 using the fluorescent  
39 indicator FIP-1 that is designed for detection of labile Fe(II). Staining with this probe suggests  
40 that unmineralized reduced iron is found in the cytoplasm and associated with magnetosomes.  
41 Our results demonstrate that, under our experimental conditions, AMB-1 is able to  
42 accumulate a large pool of iron distinct from magnetite. Finally, we discuss the biochemical  
43 and geochemical implications of these results.

44

## 45 **Importance**

46 Magnetotactic bacteria (MTB) are a group of microorganisms producing iron-based  
47 intracellular magnetic crystals. They represent a model system for studying iron homeostasis  
48 and biomineralization in bacteria. MTB contain an important mass of iron, about 10 to 100  
49 higher than other bacterial model such as *Escherichia coli*, suggesting efficient iron uptake  
50 and storage systems. Accordingly, MTB have been proposed to significantly impact the iron  
51 biogeochemical cycle in sequestering a large amount of soluble iron into crystals. Recently,  
52 several studies proposed that MTB could also accumulate iron in a reservoir distinct from  
53 their crystals. Here, we present a chemical and magnetic methodology for quantifying the  
54 fraction of the total cellular iron contained in the magnetic crystals of the magnetotactic strain  
55 *Magnetospirillum magneticum* AMB-1. Comparison of the mass of iron contained in the  
56 different cellular pools showed that most of the bacterial iron is not contained in AMB-1  
57 crystals. We then adapted protocols for the fluorescent detection of Fe(II) in bacteria, and  
58 showed that iron could be detected outside of crystals using fluorescence assays. This work  
59 suggests a more complex picture for iron homeostasis in MTB than previously thought.  
60 Because iron speciation controls its solubility, our results also provide important insights into  
61 the geochemical impact of MTB. A large pool of unmineralized iron in MTB could be more  
62 easily released in the environment than magnetite, thus limiting iron sequestration into MTB  
63 crystals.

## 64 **Introduction**

65 Many living organisms transform inorganic molecules into crystalline structures in a process  
66 called biomineralization. Magnetotactic bacteria (MTB) represent an elegant example of such  
67 organisms. They incorporate dissolved iron from their environment and precipitate it as  
68 magnetite [Fe(II)Fe(III)<sub>2</sub>O<sub>4</sub>] or greigite [Fe(II)Fe(III)<sub>2</sub>S<sub>4</sub>] nanoparticles in organelles called  
69 magnetosomes (Uebe and Schüler, 2016). MTB are ubiquitous gram-negative  
70 microorganisms in aquatic environments. They inhabit the oxic/anoxic transition zones in the  
71 water column or sediments where they thrive (Kopp and Kirschvink, 2008). In MTB,  
72 magnetosomes are aligned as chains inside the cell, and provide the bacteria with a permanent  
73 magnetic dipole presumably for navigation purposes (Uebe and Schüler, 2016).

74 Tremendous work has been carried out to determine the biological and chemical reactions  
75 leading to magnetite synthesis in MTB (McCausland and Komeili, 2020). In the two best-  
76 studied, magnetite-forming strains *Magnetospirillum magneticum* AMB-1 and  
77 *Magnetospirillum gryphiswaldense* MSR-1, magnetosome formation is a genetically-  
78 controlled process where: (i) magnetosome vesicles are formed from invagination of the inner  
79 cell membrane, (ii) empty magnetosome vesicles are aligned as a chain inside the cell, (iii)  
80 iron is transported and concentrated into magnetosome for initiation of biomineralization, and  
81 (iv) crystal size and shape are precisely controlled in a species-specific manner. A set of ~30  
82 genes, located in a distinct portion of the genome called the magnetosome island (MAI), is  
83 required and sufficient for the step-wise formation of magnetosomes (Murat *et al*, 2010).

84 Recently, iron isotope studies have provided an integrative model for iron uptake and  
85 precipitation as magnetite in the magnetotactic strain AMB-1 (Amor *et al*, 2016, 2018). This  
86 model assumes that dissolved Fe(II) or Fe(III) species are incorporated into AMB-1 and  
87 stored in the cytoplasm and/or periplasm as Fe(III). This Fe(III) pool is then partially reduced  
88 into Fe(II) for trafficking to magnetosomes, and oxidized for precipitation as magnetite

89 (Amor *et al*, 2018). Direct mass spectrometry measurements of iron content and iron isotope  
90 composition in AMB-1 cells devoid of magnetosomes suggests that a large pool of iron,  
91 which could represent at least 50% of the total cellular iron, accumulate in reservoir(s)  
92 distinct from magnetite (Amor *et al*, 2016, 2018). The above-mentioned high-resolution mass  
93 spectrometry measurements of iron showed discrepancy with previous X-ray absorption  
94 analyses performed on both AMB-1 and MSR-1 strains, in which magnetite was the sole iron  
95 species detected at the end of the biomineralization process (Baumgartner *et al*, 2013; Fdez-  
96 Gubieda *et al*, 2013).

97 In the present work, we address the discrepancy between the mass spectrometry and X-ray  
98 absorption experiments by determining the distribution of iron in AMB-1 cells. We grew  
99 AMB-1 with different iron concentrations, and measured the mass of iron taken up by the  
100 bacteria using chemical assays. Cells were then recovered and the mass of iron contained in  
101 magnetite was quantified from magnetic characterizations. From these experimental results,  
102 we found that magnetite represents ~25 to ~30% of the bulk cellular iron. Additional cultures  
103 of AMB-1 were grown to determine the total mass of iron contained in magnetite at the scale  
104 of a bacterial population. Simultaneous cell counting allowed us to estimate the mean mass of  
105 magnetite per cell. Comparison of these results with published single-cell quantification of  
106 bulk iron in AMB-1 supported mass balance estimations. Finally, we used a fluorescent  
107 reporter of iron to show that at least part of the non-crystalline iron is present as Fe(II) species  
108 within bacterial cells. To further investigate the link between magnetite formation and iron  
109 incorporation, mutant AMB-1 strains ( $\Delta mamP$  and  $\Delta mamT$  strains lacking the protein MamP  
110 and MamT, respectively) showing biomineralization defects were also analyzed following the  
111 same approaches (Fig. 1). Bacterial cultures of all strains were carried out in triplicates.

112 All data support the presence a large pool of iron, at least partially reduced, distinct from  
113 magnetite in AMB-1 under our experimental conditions. These results raise important

114 biochemical (*i.e.* iron homeostasis in MTB) and geochemical (*i.e.* impact of MTB on the iron  
115 biogeochemical cycle) questions that we address in the discussion of this article.

116

## 117 **Results**

### 118 **Iron depletion and speciation in AMB-1 cultures**

119 We first cultivated wild-type AMB-1 (Fig. 1) for three days at two iron concentrations (30  
120 and 150  $\mu\text{M}$ ). Sterile media containing no bacteria were also prepared and used as a control  
121 condition. The iron concentration and oxidation state were monitored in AMB-1 cultures and  
122 sterile media using the ferrozine assay (see materials and methods). Iron concentration and  
123 oxidation state in the filtered sterile media remained constant over the three days of  
124 incubation, showing that all iron in the growth media can be analyzed by the ferrozine assay  
125 (Table 1; Fig. 2). Therefore, the decrease in iron concentration in the growth media is not due  
126 to precipitation of small iron phases excluded during filtration and can be attributed to iron  
127 uptake by AMB-1. Initial and final Fe(II), total iron concentration and pH in wild-type AMB-  
128 1 growth media, as well as final optical densities ( $\text{OD}_{400\text{nm}}$ ), are given in Table 2. Most of the  
129 bacterial iron uptake, normalized to biomass, occurred between one and two days of culture  
130 (Fig. 2): iron depletion was  $0.10 \pm 0.04$  and  $0.95 \pm 0.21$  mg per unit of optical density after 26  
131 hours of culture for an initial iron concentration of 30 and 150  $\mu\text{M}$ , respectively; and  $0.37 \pm$   
132  $0.03$  and  $1.05 \pm 0.15$  mg per unit of optical density after 46 hours of culture for an initial iron  
133 concentration of 30 and 150  $\mu\text{M}$ , respectively (Fig. 3A). For an initial concentration of 30  $\mu\text{M}$ ,  
134 no further iron depletion occurred after 46 h of culture. In contrast, the mass of iron depleted  
135 from the growth medium decreased to  $0.69 \pm 0.18$  mg per unit of optical density in cultures  
136 provided with 150  $\mu\text{M}$  of iron. Iron speciation was also modified over bacterial growth. 40  
137 and 17% of the initial Fe(III) added to the growth media containing 30 and 150  $\mu\text{M}$  of iron,  
138 respectively, became immediately reduced after inoculation (Fig. 4). Remaining Fe(III) was

139 then progressively reduced until complete reduction, which happened after 46 and 69 hours of  
140 culture for an initial iron concentration of 30 and 150  $\mu\text{M}$ , respectively. Finally, the growth  
141 medium pH showed a similar increase between the two iron conditions, with final values of  
142  $\sim 7.5$  (Table 2).

143 Iron uptake by the two mutant  $\Delta\text{mamP}$  and  $\Delta\text{mamT}$  strains was then measured following the  
144 same experimental procedure. Because mutant strains produce less magnetite than wild-type  
145 AMB-1, as shown by the electron microscope observations (Fig. 1), we cultivated them with  
146 iron at 150  $\mu\text{M}$  to measure iron uptake more accurately. The highest iron uptake by wild-type  
147 AMB-1 was observed at  $\sim 45$  h of culture (see results). Accordingly,  $\Delta\text{mamP}$  and  $\Delta\text{mamT}$   
148 strains were cultivated for  $\sim 45$  hours. Wild-type AMB-1 cultures were used as controls. The  
149 pH and optical density (OD) values were almost identical in all cultures of the three wild-type  
150 control,  $\Delta\text{mamP}$  and  $\Delta\text{mamT}$  AMB-1 strains (Table 3).  $\Delta\text{mamP}$  cells showed limited iron  
151 incorporation normalized to the optical density, with a  $\sim 4$ -fold decrease compared to the wild-  
152 type (Table 3). Iron uptake by  $\Delta\text{mamT}$  cells showed inconsistent values, with bulk iron  
153 concentration showing a slight increase during bacterial growth in two of the three replicates,  
154 and a decrease in the third replicate. We considered these data to be inconclusive. Finally, the  
155 Fe(II) / total Fe ratios were slightly lower in  $\Delta\text{mamP}$  ( $0.11 \pm 0.02$ ) and  $\Delta\text{mamT}$  ( $0.09 \pm 0.02$ )  
156 compared to wild-type AMB-1 ( $0.16 \pm 0.03$ ).

157

### 158 **Magnetic properties of AMB-1 cultures**

159 After chemical analyses, bacteria were recovered and transferred into sample holders for  
160 magnetic analyses. Hysteresis loops were measured on whole bacterial populations (Fig. S1).  
161 Sample preparation was performed under anoxic conditions to prevent magnetite oxidation  
162 into maghemite [ $\gamma\text{-Fe}_2\text{O}_3$ ]. Three magnetic parameters were extracted from hysteresis loops:  
163 the remanent magnetization ( $M_{\text{rs}}$ ), the saturation magnetization ( $M_{\text{s}}$ ) and the coercivity ( $H_{\text{c}}$ ).

164  $M_s$  depends only on the mass of magnetic material for a given phase, and is 92 emu per gram  
165 of magnetite (Zaitsev *et al*, 1999). Iron phases in MTB have been extensively described. In  
166 AMB-1 and MSR-1, as well as in the closely-related strain *Magnetospirillum*  
167 *magnetotacticum* MS-1, three iron species were evidenced both from bulk measurements and  
168 observations at the atomic scale: magnetite, ferrihydrite and  $Fe^{2+}$  (Frankel *et al*, 1983; Faivre  
169 *et al*, 2007; Baumgartner *et al*, 2013; Fdez-Gubieda *et al*, 2013; Uebe *et al*, 2019). Ferrihydrite  
170 and  $Fe^{2+}$  are paramagnetic at room-temperature, and do not contribute to the  $M_s$  signal  
171 (Towe and Bardley, 1967; Aharoni, 2000; Wang *et al*, 2016). The  $M_s$  values thus provide  
172 accurate estimates of the mass of iron in magnetite, which is a ferrimagnetic material.  $M_{rs}$   
173 corresponds to the remanent sample magnetization measured under an external magnetic field  
174 of zero, after exposing the sample to a saturating external field.  $M_{rs}/M_s$  ratio depends on  
175 particle size and organization, and is typically ranging between 0.43 and 0.50 in AMB-1  
176 (Dunlop, 2002; Li *et al*, 2012). Finally,  $H_c$  is the magnetic field strength required to reduce  
177 the magnetization of the sample to zero after fully magnetizing it. Thus,  $H_c$  represents the  
178 capability of a magnetic material to resist demagnetization. It depends on the particle size, its  
179 shape, its magnetization, and its magnetocrystalline anisotropy.

180 Magnetic parameters calculated from hysteresis loops (Fig. S1) are given in Table 4 and Fig.  
181 5. After 26 hours of growth, remanent ( $M_{rs}$ ) and saturation ( $M_s$ ) magnetizations were similar  
182 between the two experimental conditions (Figs. 5A and 5B). Similar to iron uptake patterns,  
183 most magnetite was precipitated between 26 and 46 hours of culturing in both conditions. No  
184 variation in  $M_{rs}$  and  $M_s$  was observed for longer time of culture. Final  $M_{rs}$  was  $9.57 \pm 2.41 \times$   
185  $10^{-4}$  emu and  $2.09 \pm 0.57 \times 10^{-3}$  emu for AMB-1 cultivated with iron at 30 and 150  $\mu M$ ,  
186 respectively. Final  $M_s$  values were  $2.06 \pm 0.44 \times 10^{-3}$  and  $4.13 \pm 0.38 \times 10^{-3}$  emu for AMB-1  
187 cultivated with iron at 30 and 150  $\mu M$ , respectively. Knowing the magnetic moment of  
188 magnetite per unit of mass (92 emu/g), the  $M_s$  values were converted to a mass of iron



189 contained in magnetite. Results are given in Fig 3B. The maximum mass of iron in magnetite  
190 measured was  $0.082 \pm 0.015$  and  $0.15 \pm 0.015$  mg per unit of optical density in AMB-1  
191 cultivated with 30 and 150  $\mu\text{M}$  of iron, respectively. From the remanent and saturation  
192 magnetization values, we calculated the  $M_{rs} / M_s$  ratios. Almost identical values between the  
193 two experimental conditions were observed:  $\sim 0.38$ ,  $\sim 0.50$  and  $\sim 0.50$  after 26, 46 and 69 hours  
194 of cultures, respectively (Fig. 5C). Coercivity showed a slightly different pattern, as it  
195 progressively increased with time (Fig. 5D). After 26 hours of growth, the coercivity of  
196 AMB-1 cultures was  $\sim 50$  Oe for both initial iron concentrations. At longer growth times,  
197 AMB-1 cultivated with 150  $\mu\text{M}$  showed higher coercivities ( $180 \pm 5$  Oe and  $224 \pm 31$  Oe for  
198 46 and 69 hours of growth, respectively) than AMB-1 cultivated with 30  $\mu\text{M}$  of iron ( $132 \pm 8$   
199 Oe and  $146 \pm 26$  Oe for 46 and 69 hours of growth, respectively).

200 We measured the mass of ferrimagnetic material in mutant AMB-1 strains following the same  
201 approach. Jones and co-workers showed that nanoparticles produced in the  $\Delta mamP$  and  
202  $\Delta mamT$  cells also correspond to magnetite (Jones *et al*, 2015). Therefore, the same saturation  
203 magnetization per unit of mass (92 emu/g) was used to calculate the mass of iron contained in  
204 magnetite. Mutant AMB-1 strains showed altered magnetic properties (Table 5). The  
205 remanent and saturation magnetizations in the  $\Delta mamP$  strain were  $\sim 1$  order of magnitude  
206 lower than wild-type. Associated  $M_{rs} / M_s$  ratios showed lower values in  $\Delta mamP$  AMB-1  
207 ( $0.34 \pm 0.09$ ) compared to the wild-type control ( $0.46 \pm 0.05$ ). In  $\Delta mamT$  AMB-1, the  
208 saturation magnetization showed even lower values ( $\sim 2$  orders of magnitude lower than the  
209 wild-type strain), while the remanent magnetization was  $\sim 0$ . Accordingly,  $M_{rs} / M_s$  ratios  
210 corresponding to magnetite produced by  $\Delta mamT$  cells were also  $\sim 0$ . Finally, coercivity  
211 showed a  $\sim 3$ - to 4-fold decrease in the  $\Delta mamP$  strain, and was close to zero in all  $\Delta mamT$   
212 mutant samples.

213

## 214 **Iron distribution in AMB-1 populations**

215 Having determined the mass of iron in the different bacterial pools (*i.e.* magnetite and the rest  
216 of the cell), we finally wanted to quantify the iron distribution in AMB-1. The mass of iron in  
217 the lysate ( $mass_{lysate}$ , *i.e.* the fraction distinct from magnetite) was calculated from:

218

$$219 \quad mass_{lysate} = mass_{cell} - mass_{magnetite} \quad (\text{Eq. 1})$$

220

221 where  $mass_{cell}$  and  $mass_{magnetite}$  are the mass of iron contained in whole AMB-1 cells and in  
222 magnetite, respectively.  $mass_{cell}$  was calculated from chemical assays, and  $mass_{magnetite}$  was  
223 calculated from magnetic characterizations. The fraction of the total cellular iron contained in  
224 magnetite ( $F_{magnetite}$ , in %) was calculated from:

225

$$226 \quad F_{magnetite} = \frac{mass_{cell} - mass_{lysate}}{mass_{cell}} \times 100 \quad (\text{Eq. 2})$$

227

228 where  $mass_{lysate}$  was calculated from Eq. 1.

229 Using results presented in Figs. 3A and 3B, we calculated the fraction of the total cellular iron  
230 contained in magnetite ( $F_{magnetite}$  in Eq. 2) (Fig. 6). The mass of magnetite produced by wild-  
231 type AMB-1 cells cultivated at 30 and 150  $\mu\text{M}$  was similar after 26 hours of growth, but iron  
232 uptake was 10 times higher under high-iron conditions. Therefore, magnetite corresponded to  
233  $11.2 \pm 6\%$  of the total cellular iron at this time point under low-iron conditions, but only  $0.9 \pm$   
234  $0.3\%$  of the cellular iron under high-iron conditions. In bacteria cultivated with 30  $\mu\text{M}$  of iron,  
235 the fraction of cellular iron in magnetite increased to  $21.9 \pm 4$  and  $26 \pm 3\%$  after 46 and 69  
236 hours of culture, respectively. In the 150  $\mu\text{M}$  iron experimental conditions, it increased up to  
237  $14.5 \pm 3$  and  $24.3 \pm 5\%$  after 46 and 69 hours of culture, respectively (Fig. 6). We note that all  
238 cells from every sample observed under the electron microscope contained magnetite crystals.

239 Therefore, our data cannot be explained by bacteria that accumulate iron without producing  
240 magnetite crystals. We manipulated and stored magnetite under anoxic conditions ( $[O_2] <$   
241  $1\text{ppm}$ ) to prevent its oxidation into maghemite [ $\gamma\text{-Fe(III)}_2\text{O}_3$ ] (Gallagher et al, 1968; Freer and  
242 O'Reilly, 1980; Rebodos and Vikesland, 2010). The saturation magnetization of maghemite is  
243 60-80 emu per gram (Cornell and Schwertmann, 2004). Even if all magnetite became fully  
244 oxidized, the mass of iron precipitated as crystals in wild-type AMB-1 would be at most 40%  
245 higher as in Fig. 3B, and the mineral fraction of AMB-1 would represent no more than ~50-  
246 60% of the total cellular iron. In this case, our data would still support a significant pool of  
247 iron accumulating outside of magnetosome crystals. Finally, we ensured that all iron fractions  
248 in AMB-1 cultures were recovered (see materials and methods). Thus, a loss of iron during  
249 sample extraction and preparation cannot explain our results. Our data demonstrate that  
250 magnetite does not represent the major iron reservoir in AMB-1 under our experimental  
251 conditions.

252 To further demonstrate that iron accumulates outside of magnetite, we used additional wild-  
253 type AMB-1 cultures to assess the mean mass of magnetite per AMB-1 cell. Cell counting  
254 under a light microscope using a hemocytometer indicated an almost identical total number of  
255 cells for the two replicates:  $8.48 \pm 2.21 \times 10^{10}$  and  $8.39 \pm 2.26 \times 10^{10}$ . The total mass of  
256 magnetite produced in these cultures and calculated from magnetic measurements was 0.025  
257 and 0.024 mg. This yields a mean mass of iron contained in magnetite per cell of  $2.11 \times 10^{-7}$   
258 and  $2.10 \times 10^{-7}$  ng for the two replicates, which corresponds to ~21 % of the bulk mass of iron  
259 measured in AMB-1 cells (Amor *et al*, 2019).

260 Additional wild-type cultures used as controls for experiments with the mutant strains showed  
261 similar results, with  $\sim 31 \pm 8$  % of the bulk cellular iron contained in magnetite. Magnetite in  
262  $\Delta\text{mamP}$  bacteria represented only  $13 \pm 12$  % of the total cellular iron. All  $\Delta\text{mamP}$  cells also  
263 produced magnetite under our experimental condition. Finally, the fraction of iron contained

264 in  $\Delta mamT$  magnetite could not be determined because of inconclusive data on iron  
265 incorporation into these mutant bacteria (see above).

266

### 267 **Subcellular localization and speciation of iron in AMB-1**

268 Iron distribution assessments demonstrated that AMB-1 cells contain a large pool of iron,  
269 distinct from magnetite. However, they did not provide physical and chemical information  
270 about this additional pool. To determine the localization and speciation of iron in AMB-1, we  
271 used the fluorescence FRET Iron Probe 1 (FIP-1), an activity-based probe that allows the  
272 detection of labile Fe(II) (Aron et al, 2016). FIP-1 is made of a green (fluorescein) and a red  
273 (cyanine) fluorophores linked by an Fe(II)-cleavable endoperoxide. In the native FIP-1 state,  
274 the fluorescence energy of the excited fluorescein is transferred to the cyanine through a  
275 Fluorescence Resonance Energy Transfer (FRET) mechanism. In that case, only a red  
276 fluorescence signal can be observed. Upon reaction with labile Fe(II), the linker between the  
277 two fluorophores gets cleaved and a green fluorescence signal can be detected (Aron *et al*,  
278 2016). To further constrain the speciation and subcellular localization of iron distinct from  
279 magnetite in AMB-1, wild-type,  $\Delta mamP$  and  $\Delta mamT$  cells were incubated with the FIP-1  
280 probe and imaged via structured illumination microscopy. A mutant strain ( $\Delta MAI$ ) unable to  
281 form magnetosomes was used as a negative control (see supplementary materials).

282 A red fluorescence signal was observed in all samples, indicating the uptake of FIP-1 (Figs. 7,  
283 S4 and S5). A very weak green signal was observed in  $\Delta MAI$  bacteria (Fig. S5), suggesting a  
284 lower labile iron concentration in these mutant cells. This observation is in good agreement  
285 with quantification of bulk iron in wild-type and  $\Delta MAI$  bacteria (Amor *et al*, 2019). Both red  
286 and green fluorescence patterns showed intracellular heterogeneities, demonstrating that FIP-  
287 1 has been internalized into AMB-1. In wild-type bacteria, the green fluorescence signal was  
288 diffuse in the cytoplasm, although unstained spaces corresponding to PHB (Poly- $\beta$ -

289 hydroxybutyrate, a carbon storage molecule) granules can be observed (Figs. 5 and S4).  
290 Green fluorescence signal also accumulated at the poles of the cell (Fig. S4). Such  
291 accumulation can be observed in dividing cells at the septum location (Fig. S6). Most of wild-  
292 type cells also showed a green fluorescence associated with the magnetosome chains (Fig. 7).  
293 AMB-1 produces fragmented chains of magnetite, with magnetosome vesicles spreading  
294 along the cell's long axis from pole to pole (Komeili *et al*, 2006; Arakaki *et al*, 2016). Unlike  
295 other *Magnetospirillum* strains such as MSR-1, apparent gaps between magnetite crystals can  
296 be observed from electron microscopy in AMB-1 (Fig. 1). These gaps correspond to empty  
297 magnetosome vesicles, containing no magnetite nanoparticles (Komeili *et al*, 2006; Arakaki  
298 *et al*, 2016). In our observations, the green fluorescence signals formed fragmented lines (*i.e.*  
299 similar to magnetite crystals) (Figs. 7 and S7). In some rare cases, the fluorescence lines  
300 extended almost from poles to poles (*i.e.* similar to magnetosome vesicles). As mentioned  
301 above, all bacteria observed with electron microscopy contained magnetite nanoparticles.  
302 Therefore, fluorescence patterns showing continuous lines cannot indicate empty vesicles in  
303 cells making no magnetite.  $\Delta mamP$  showed all of the fluorescence features that have been  
304 observed in the wild-type strain (Figs. 7 and S8), whereas chains of magnetosomes could not  
305 be detected in  $\Delta mamT$  AMB-1 using FIP-1 (Figs. 7 and S9).

306

307

## 308 **Discussion**

309 Mass balance experiments identified a large amount of iron distinct from magnetite in AMB-1,  
310 representing ~75 % of the bulk cellular iron in our experimental conditions. These results  
311 suggest a more complex picture for iron cycling and homeostasis in MTB than previously  
312 thought, as intracellular iron needs to be handled by the cell to prevent toxic effects.

313

## 314 **Iron incorporation and distribution in AMB-1**

315 Monitoring iron concentration and oxidation state in AMB-1 growth medium demonstrated  
316 that initial Fe(III) became progressively reduced into Fe(II) (Fig. 4). Accumulation of Fe(II)  
317 could result from active reduction by AMB-1, or illustrate respiration reactions depleting  
318 oxygen in AMB-1 medium. Our experimental setup cannot rule out one of the two  
319 possibilities, but we note that iron isotopes identified Fe(III) reduction within AMB-1 cells,  
320 and subsequent diffusion of intracellular Fe(II) to the growth medium (Amor *et al*, 2018).

321 Iron incorporation into wild-type AMB-1 was higher under high-iron conditions. When  
322 normalized to optical density, which is proportional to the concentration of cells in culture,  
323 iron uptake by AMB-1 after 26 h of culture was ~10-fold higher in the 150  $\mu$ M experimental  
324 condition, compared to the 30  $\mu$ M condition (Fig. 3). However, the mass of magnetite was  
325 similar in the two culture conditions (Fig. 3), indicating that the limiting step for  
326 biomineralization corresponds to magnetite precipitation and maturation, rather than iron  
327 uptake into the cell. Mass balance estimations were consistent in all wild-type cultures, and  
328 indicated that ~25 to ~30 % of the bulk cellular iron was contained in magnetite after 69h of  
329 growth. The mean mass of iron contained in magnetite per cell ( $\sim 0.21 \times 10^{-6}$  ng), estimated  
330 from cell counting and magnetic quantification using a VSM, corresponds to 21 % of the bulk  
331 iron content in AMB-1 determined by single-cell mass spectrometry analyses under the same  
332 experimental conditions (Amor *et al*, 2019). The results are almost identical to the mass  
333 balance estimations, and show that most of iron is contained in reservoir(s) distinct from  
334 magnetite. Moreover, the combination of electron microscopy and mass spectrometry  
335 measurements for quantification of iron content in AMB-1 evidenced a delay in magnetite  
336 formation as iron was incorporated into bacteria (Amor *et al*, 2019). This observation further  
337 supports accumulation of intracellular iron outside of magnetite.

338 The limited iron incorporation into  $\Delta mamP$  AMB-1 suggests that magnetite biomineralization  
339 regulates iron assimilation. Whether this regulation corresponds to a direct or indirect  
340 mechanism remains unclear. A likely hypothesis could be that the iron accumulation capacity  
341 of the cell's fraction distinct from magnetite is limited. Once bacteria are fully loaded with  
342 iron, its sequestration into magnetite would be required for further assimilation. Such model  
343 would imply a two-step process for magnetite biomineralization, in which iron is first stored  
344 in the non-crystalline fraction of the cell, and then precipitated as magnetite. This is in good  
345 agreement with what has been proposed for iron cycling in AMB-1 and MSR-1 (Baumgartner  
346 *et al*, 2013; Fdez-Gubieda *et al*, 2013; Amor *et al*, 2018, 2019). The lack of MamP in the  
347 mutant strain could hamper iron precipitation in magnetosomes, and thus indirectly prevent  
348 further iron assimilation.

349 If 75 % of intracellular iron in AMB-1 is not stored in magnetite, the pool distinct from  
350 magnetite should represent  $\sim 0.75 \times 10^{-6}$  ng of iron per cell (Amor *et al*, 2019). This mass is  
351 estimated to be 10 to 100-fold higher than the mass of iron in *Escherichia coli* cells (Andrews  
352 *et al*, 2003). The iron content in the  $\Delta MAI$  AMB-1 strain, unable to form magnetosomes, was  
353 also estimated to be 5- to 10-fold higher than *E. coli* cells (Amor *et al*, 2019). Excess of free  
354 iron in the intracellular medium is toxic for cells (Andrews *et al*, 2003), which suggests  
355 efficient iron storage and detoxifying pathways in AMB-1. They could include ferritins,  
356 bacterioferritins and Dps proteins (Andrews *et al*, 2003; Uebe *et al*, 2010, 2019). Dps and  
357 bacterioferritins have recently been shown to protect MSR-1 from oxidative stress (Uebe *et al*,  
358 2019), and phases corresponding to ferritin-like structures have been evidenced in AMB-1,  
359 MSR-1, and MS-1 strains using spectroscopic methodologies (Frankel *et al*, 1983; Faivre *et al*,  
360 2007; Uebe *et al*, 2010; Baumgartner *et al*, 2013; Fdez-Gubieda *et al*, 2013; Uebe *et al*, 2019).  
361 Further iron toxicity assays in MTB and mutant strains lacking some of these iron-storing

362 proteins will help to better understand the capacity of MTB to tolerate such high intracellular  
363 iron concentrations.

364

### 365 **Discrepancy with previous work**

366 Our results clearly showed discrepancy with previous characterizations of iron species in the  
367 two magnetotactic strains AMB-1 and MSR-1 using X-ray absorption methodologies  
368 (Baumgartner *et al*, 2013; Fdez-Gubieda *et al*, 2013). In these two studies, time-course  
369 experiments were carried out in which AMB-1 or MSR-1 cells were cultivated without iron.  
370 When reaching saturation of cell density, iron was added to the growth medium to trigger  
371 magnetite biomineralization. Phases likely corresponding to ferrihydrite were first observed in  
372 both strains. When biomineralization was complete, magnetite was the sole iron carrier  
373 observed in bacteria. Since additional iron was detected by mass spectrometry and the  
374 protocol described in the present research, such discrepancy could suggest that X-ray  
375 absorption is not suitable for detection of iron that is not contained in magnetite or ferrihydrite.  
376 However, the important fraction of iron we identified in the iron pool distinct from magnetite  
377 rather suggests that the discrepancy arises from different experimental protocols. Moreover,  
378 recent work on MSR-1 also suggested that iron can be contained outside of magnetite in this  
379 strain (Berny *et al*, 2020). Iron-starving conditions can impact the iron cycling and  
380 homeostasis in MTB, as low-iron conditions have been shown to induce overexpression of  
381 iron acquisition systems in AMB-1 and MSR-1 (Suzuki *et al*, 2006; Wang *et al*, 2017). They  
382 might optimize the transfer of incorporated iron to magnetosomes for magnetite precipitation.  
383 Further X-ray absorption analyses with iron-starved bacteria and cells grown under standard  
384 conditions (*i.e.* as in the present work) will be needed to confirm this hypothesis.

385



386 **The magnetic properties of AMB-1 cultures illustrate defects in magnetite**  
387 **biomineralization**

388 In addition to the mass of magnetite produced in AMB-1 cultures, magnetic characterizations  
389 of bacterial samples provided important insights on the nanoparticle size and organization.  
390 AMB-1 produces stable single-domain magnetite nanoparticles (Li *et al*, 2012). The  $M_{rs} / M_s$   
391 ratios corresponding to wild-type, mature AMB-1 magnetite typically range between 0.43 and  
392 0.50 (Dunlop, 2020; Li *et al*, 2012). Smaller magnetite particles with crystal dimensions  
393 below 30 nm (for a width / length ratio of 0.2 or higher) are not magnetically stable at room-  
394 temperature, and fall within the superparamagnetic domain (Muxworthy and Williams, 2009).  
395 Their remanence magnetization is thus 0 at room-temperature, but their saturation  
396 magnetization remains unchanged for a given mass of magnetite. Very small  
397 superparamagnetic particles (<10 nm in length) would not reach complete saturation under  
398 the maximum external field we used (4 000 Oe) at room-temperature (Zuoquan et al, 2014).  
399 These particles represent less than 5% of the magnetite crystals observed under electron  
400 microscopy (Fig. S2). The underestimation of the saturation magnetization of these  
401 nanoparticles would be around 20 % (Zuoquan et al, 2014), meaning that the underestimation  
402 of the mass of magnetite would be below 1% and thus negligible. A mixing of stable single-  
403 domain and superparamagnetic particles would lead to lower  $M_{rs} / M_s$  ratios (Dunlop, 2002).  
404  $M_{rs} / M_s$  ratios of ~0.38 observed after 26h of growth in wild-type cultures could thus reflect a  
405 mixing of mature and newly formed particles. Even though iron uptake was ~10-fold higher  
406 under high-iron conditions (Fig. 3),  $M_{rs} / M_s$  ratios in the two iron conditions were identical  
407 regardless of the initial iron concentration in the growth medium. As mentioned above, this  
408 suggests magnetite precipitation and growth as the limiting step for biomineralization in  
409 AMB-1. For longer culture times,  $M_{rs} / M_s$  ratios in wild-type AMB-1 were consistent with  
410 values ranging between 0.46 and 0.49 typical of AMB-1 magnetite (Li *et al*, 2012).  $\Delta mamP$

411 and  $\Delta mamT$  AMB-1 also showed decreased  $M_{rs} / M_s$  ratios compared to the expected  $\sim 0.45$   
412 value.  $M_{rs} / M_s$  ratios in  $\Delta mamP$  cultures of 0.34 are consistent with a mixing of stable single-  
413 domain magnetite and smaller superparamagnetic particles as confirmed by electron  
414 microscopy observations (Fig. 1). As mentioned above, very small superparamagnetic  
415 particles would not reach saturation at room-temperature, leading to an underestimation of the  
416 mass of magnetite of  $\sim 20\%$ . In that case, our results would still support a large pool of iron  
417 distinct from magnetite in the  $\Delta mamP$  strain. Contrastingly,  $\Delta mamT$  showed  $M_{rs}$  and  $M_{rs} / M_s$   
418 ratios of zero, which are both consistent with superparamagnetic particles produced in this  
419 strain. Electron microscopy demonstrated that  $\Delta mamT$  bacteria produced  $\sim 10$  to  $20$ -nm long  
420 nanoparticles, in good agreement with the magnetic analyses (Muxworthy and Williams,  
421 2009).

422 Finally, coercivity in wild-type cultures increased with time in both iron conditions.  
423 Coercivity in stable single-domain particles such as those produced by MTB (Li et al, 2012)  
424 depends on the particle size and shape, as well as the magnetocrystalline anisotropy which is  
425 unlikely to change. Consistent  $H_c$  values between the two iron conditions after 26h of culture  
426 suggest similar size and shape for magnetite crystals, in good agreement with iron uptake  
427 patterns, remanent magnetization, and saturation magnetization (see above). For longer times  
428 of culture, AMB-1 cultivated with iron at  $150 \mu\text{M}$  showed higher coercivity. Since  $M_{rs}$  is  
429 unchanged between these two cultures, this requires that the particles are larger or a different  
430 shape under high-iron conditions. To test this hypothesis, we measured the magnetite length  
431 and width distributions in both experimental conditions. Results are given in Figs. S2 and S3,  
432 and show that the shape (length/width ratio) is almost identical in both experimental  
433 conditions. However, bigger magnetite crystals were produced by AMB-1 cultivated with iron  
434 at  $150 \mu\text{M}$  (mean length of  $38.46 \text{ nm}$ ) compared to the  $30 \mu\text{M}$  condition (mean length of  
435  $32.03 \text{ nm}$ ), suggesting that increased coercivity results from bigger particles under high-iron

436 conditions. Lower coercivities in the mutant strains can also be explained by the presence of  
437 small superparamagnetic particles.

438

### 439 **Localizing iron in AMB-1 cells**

440 Two green fluorescence patterns were observed in AMB-1 cultures: a diffuse signal across the  
441 cell, and a signal that concentrated on the magnetosome chain. The SIM fluorescence  
442 microscope did not allow image acquisition of standard optical observation using white light,  
443 thus preventing estimation of the fraction of the total cells showing a fluorescence signal.  
444 Observation of magnetosome chains using FIP-1 shows that Fe(II) is addressed to  
445 magnetosomes during biomineralization. There is a possibility that FIP-1 indicates poorly  
446 crystalline Fe(II) at the magnetite surface, but our observations are best explained by Fe(II)  
447 being contained either in magnetite-containing or magnetite-free magnetosome vesicles (see  
448 below). It is unclear whether this Fe(II) would be contained inside magnetosomes, within the  
449 magnetosome membrane, or at the magnetosome surface. From high-resolution electron  
450 microscope analyses, Werckmann and collaborators proposed that iron could accumulate in  
451 the magnetosome membrane before its precipitation as magnetite (Werckmann *et al*, 2017).  
452 Our observations are in line with these results, and indicate that iron in the magnetosome  
453 membrane would at least be composed of Fe(II) species. Genes encoding for Fe(II)  
454 transporters have been found in the magnetosome gene island, and could transport Fe(II)  
455 across the magnetosome membrane for magnetite formation (Suzuki *et al*, 2006; Rong *et al*,  
456 2008, 2012). Identical fluorescence patterns were observed in  $\Delta mamP$  AMB-1, but not in the  
457  $\Delta mamT$  strain. The chain-like localization pattern in  $\Delta mamP$  suggests that FIP-1 does not  
458 bind to magnetite, since this mutant strain produces only a few crystals per cell. It also  
459 indicates that Fe(II) is delivered to magnetosomes in the AMB-1 cells lacking MamP, and  
460 suggests that magnetite-free magnetosomes can be stained by FIP-1.

461 Another notable observation is an accumulation of fluorescence at the poles of AMB-1 cells  
462 showing a diffuse green signal. Whether such accumulation illustrates true biological  
463 mechanisms (flagellar apparatus, chemotaxis receptors, nitrate reductase complex,  
464 siderosomes, cell division) remains speculative, and additional work will be necessary to  
465 determine the significance of these observations (Müller et al, 2014; Popp *et al*, 2014;  
466 Alberge *et al*, 2015; Cunrath *et al*, 2015; Gasser *et al*, 2015).

467 Lastly, it is important to note that FIP-1 does not react with Fe(II) bound tightly to proteins as  
468 well as Fe(III) (Aron et al, 2016). It is likely that additional iron species distinct from  
469 magnetite are contained in AMB-1 cells, which include iron associated with heme domains  
470 (Siponen *et al*, 2013; Jones *et al*, 2015) or iron contained in storage proteins such as ferritins  
471 (Faivre et al, 2007; Uebe *et al*, 2019).

472

### 473 **Implications for Earth sciences**

474 It has been hypothesized that MTB deplete their environment in bioavailable iron by  
475 sequestering dissolved species into magnetite (Lin *et al*, 2014). Once the cell dies, MTB  
476 magnetite crystals can be trapped into sedimentary rocks, which effectively removes iron  
477 from the dissolved pool (Kopp and Kirschvink, 2008, Larrasoña *et al*, 2014). MTB could  
478 thus prevent other living organisms from accessing an available source of iron. Some  
479 parameters are missing to accurately quantify the impact of MTB on the iron biogeochemical  
480 cycle. One of them is the speciation of iron in MTB, which controls its solubility. Our data  
481 demonstrated that most of iron in MTB exists as soluble species (*i.e.* Fe(II) and soluble  
482 Fe(III)-organic compounds), rather than magnetite. Iron sequestration in environmental MTB  
483 might thus be more limited than previously proposed (Amor *et al*, 2019). However, the  
484 discrepancy between the present work and the former X-ray absorption characterizations of  
485 iron in MTB (Baumgartner *et al*, 2013; Fdez-Gubieda *et al*, 2013) raises questions about the

486 environmental significance of our findings. Environmental MTB populations could  
487 experience varying iron conditions, and transition from iron-starving to iron-rich conditions  
488 similar to X-ray absorption experiments (Baumgartner *et al*, 2013; Fdez-Gubieda *et al*, 2013).  
489 In this case, most of intracellular iron could be contained in magnetite, with a limited soluble  
490 iron pool. Additional work constraining iron speciation in MTB that experience transitioning  
491 iron conditions, as well as in bacterial populations sampled from the environment, will be  
492 useful to further address the impact of MTB on the iron biogeochemical cycle.

493

## 494 **Materials and Methods**

### 495 **Cultivation of wild-type and mutant AMB-1 strains**

496 *Magnetospirillum magneticum* AMB-1 (ATCC 700264) was cultivated in 200 mL-bottles.  
497 The detailed composition of AMB-1 growth medium is given by Komeili and co-workers  
498 (Komeili *et al*, 2004). The sole iron source provided to AMB-1 cultures corresponded to  
499 Fe(III)-citrate, which was added to the growth media from an Fe(III)-citrate solution prepared  
500 by mixing Fe(III)Cl<sub>3</sub> (6 mM) and citric acid (12 mM) powders (Sigma-Aldrich) in Milli-Q  
501 water. The pH of the Fe(III)-citrate solution was set at 6.9 (*i.e.* same as AMB-1 growth  
502 medium) using NaOH. The initial Fe(III) concentration in AMB-1 growth medium was either  
503 30 (*i.e.* standard concentration used in the ATCC medium) or 150 (*i.e.* the concentration used  
504 for isotope experiments)  $\mu$ M. The concentration of citrate and volume of cultures were kept  
505 constant in all experiments by adding an iron-free citrate solution (12 mM, pH 6.9) to AMB-1  
506 cultures under low-iron conditions (30  $\mu$ M). AMB-1 was cultivated in a glove box with  
507 controlled atmosphere (90% N<sub>2</sub>, 10% O<sub>2</sub>) at 30°C for three days. Each day, one bottle for  
508 each experimental condition was recovered for chemical and magnetic characterizations (see  
509 below). All measurements were carried out in triplicates (total of 18 bottles: two iron  
510 conditions, three time points, three replicates for each condition).

511 Two AMB-1 mutant strains were selected for additional experiments: the  $\Delta mamP$  and  
512  $\Delta mamT$  strains lacking the genes encoding for the MamP and MamT proteins, respectively  
513 (Murat *et al*, 2010). MamP and MamT are magnetochrome proteins, a class of c-type  
514 cytochromes specific to MTB, which can bind iron via their heme domains (Siponen *et al*,  
515 2013). Magnetochromes have been proposed to regulate the iron oxidation state in MTB  
516 (Siponen *et al*, 2013). The two mutant strains show biomineralization defects, which enable  
517 us to investigate the link between magnetite formation and iron uptake. The  $\Delta mamP$  strain  
518 produces only a few crystals per cell resembling those produced by wild-type AMB-1, as well  
519 as a few additional small crystals (Fig. 1A-C).  $\Delta mamT$  bacteria synthesize many small,  
520 elongated crystals (Fig.1D). The  $\Delta mamP$  and  $\Delta mamT$  strains have already been produced by  
521 our group (Murat *et al*, 2010). In AMB-1, *mamT* gene is located in the *mamAB* gene clusters  
522 of the MAI (termed R5 region in our previous work) downstream of three genes *mamQ*,  
523 *mamR* and *mamB* (Murat *et al*, 2010; Uebe and Schöler, 2016). These three genes are  
524 perfectly duplicated in the R9 region of the MAI, downstream of *mamT*. To avoid  
525 recombination between regions R5 and R9, the region R9 was deleted from  $\Delta mamT$ .  
526 Therefore, bacteria used in this study correspond to the  $\Delta mamT\Delta R9$  strain, and are referred to  
527 as  $\Delta mamT$ . We ensured that  $\Delta mamT$  and  $\Delta mamT\Delta R9$  strains show similar biomineralization  
528 defects and both can be complimented with *mamT* expressed from a plasmid (Jones *et al*,  
529 2015). Because the mutant strains produce less magnetite than wild-type AMB-1, as shown  
530 by the electron microscope observations (Fig. 1), we cultivated them with Fe(III)-citrate at  
531 150  $\mu$ M to measure iron uptake more accurately. The highest iron uptake by wild-type AMB-  
532 1 was observed at ~45 h of culture (see results). Accordingly,  $\Delta mamP$  and  $\Delta mamT$  strains  
533 were cultivated for ~45 hours in triplicates in 200-mL bottles (total of 9 bottles: 3 replicates  
534 for  $\Delta mamP$  and  $\Delta mamT$  and 3 replicates for wild-type bacteria used as a control).

535

## 536 **Transmission electron microscopy**

537 Bacteria were deposited on copper grids coated with a Formvar film, and observed with a  
538 transmission electron microscope (FEI Tecnai 12) operating at 120 kV. From electron  
539 microscopy observations, the length of magnetite nanoparticles produced by wild-type AMB-  
540 1 cultivated for three days with Fe(III) at either 30 or 150  $\mu\text{M}$  was measured using the ImageJ  
541 software.

542

## 543 **Chemical measurements**

544 Bacterial iron uptake was quantified by measuring iron concentration in AMB-1 cultures at  
545 initial (immediately after inoculation) and final (at the end of the bacterial culture) stages  
546 using the ferrozine assay (Hunter *et al*, 2013). Ferrozine forms a purple-colored complex with  
547 Fe(II), which can be determined spectrophotometrically. Total iron is then determined by total  
548 reduction of iron in the sample with hydroxylamine hydrochloride and subsequent reaction  
549 with ferrozine. Concentration of Fe(III) is calculated as the difference of total iron and Fe(II).  
550 For each condition, pH and optical density at 400 nm ( $\text{OD}_{400\text{nm}}$ ) were measured. Then, 1 mL  
551 of culture was sampled and filtered (0.22- $\mu\text{m}$  pore size; Acrodisc syringe filters,  
552 polyethersulfone) at the initial and final stages. The Fe(II) and total iron concentrations were  
553 measured using the ferrozine assay. The mass of iron taken up by AMB-1 was calculated  
554 from iron depletion in each culture.

555 To demonstrate the reliability of the ferrozine assay for measuring iron depletion in AMB-1  
556 cultures, we also prepared sterile growth media provided with Fe(III)-citrate at 30 or 150  $\mu\text{M}$   
557 in 200-mL bottles. One mL of growth media was sampled and filtered (0.22- $\mu\text{m}$  pore size;  
558 Acrodisc syringe filters, polyethersulfone) after iron addition. Iron concentration and  
559 speciation was measured with the ferrozine assay as described above. Sterile bottles were  
560 incubated for 1, 2 or 3 days at 30°C in the glove box (90%  $\text{N}_2$ , 10%  $\text{O}_2$ ). At the end of

561 experiment, 1 mL of growth media was recovered, filtered and the iron concentration and  
562 speciation were measured using the ferrozine assay. Three replicates per condition were  
563 prepared (18 samples total, as for wild-type bacterial cultures).

564

### 565 **Magnetic characterizations**

566 After chemical analyses, whole growth media were recovered and centrifuged (8,000 rpm, 10  
567 min). Supernatants were discarded, and bacterial pellets corresponding to the entire bacterial  
568 populations were dried in an anoxic chamber (98% N<sub>2</sub>, 2% H<sub>2</sub>, O<sub>2</sub> < 1 ppm) at room  
569 temperature to prevent magnetite oxidation. We have already demonstrated that no significant  
570 fraction of iron is adsorbed on AMB-1 cell surfaces (Amor *et al.*, 2018). Virtually all iron  
571 contained in bacterial pellets thus corresponds to intracellular iron. Once dried, whole  
572 bacterial pellets were transferred into sample holders inside the anoxic chamber for  
573 subsequent magnetic characterizations. Samples were kept in anoxic conditions until  
574 magnetic analyses were performed. Hysteresis loops of magnetization versus applied  
575 magnetic field were measured using a Vibrating-Sample Magnetometer (LakeShore VSM  
576 7410) at room temperature. An integration time of 10 s per point was used.

577

### 578 **Iron mass balance**

579 To demonstrate the validity of our protocol and the accuracy of our measurements, we  
580 ensured that all iron fractions were recovered and that no iron was lost during sample  
581 extraction and preparation. Additional wild-type AMB-1 cultures were carried out in 200-mL  
582 bottles for three days. One mL of growth medium was sampled and filtered before and after  
583 cultures, and iron concentration was measured using the ferrozine assay as described above.  
584 Cells were recovered by centrifugation (8,000 rpm, 10 min). The supernatant was discarded  
585 and bacterial pellets were suspended in 100 µL of phosphate buffer (PBS). Cells were washed



586 three times in PBS and stored for subsequent measurements of total cellular iron mass ( $m_{\text{cell}}$ )  
587 using single-cell – inductively coupled plasma - mass spectrometry following a protocol  
588 previously published (Amor *et al*, 2019). Before mass-spectrometry measurements, PBS  
589 solution containing the bacteria was filtered to measure the potential mass of iron that leaked  
590 outside of the cells using high-resolution – inductively coupled plasma - mass spectrometry  
591 ( $m_{\text{leaked}}$ ) (Amor *et al*, 2019). Iron recovery was assessed from the following mass balance  
592 equation:

$$593$$
$$594 \quad m_{\text{initial medium}} = m_{\text{residual medium}} + m_{\text{cell}} + m_{\text{leaked}} \quad (\text{Eq. 3})$$
$$595$$

596 where  $m_{\text{initial medium}}$ , and  $m_{\text{residual medium}}$  are the mass of iron in the growth medium before and  
597 after AMB-1 cultures, respectively.  $m_{\text{leaked}}$  represented ~0.5 % of  $m_{\text{cell}}$  or less (Table 1). Mass  
598 balance estimations showed that iron recovery during sample preparation was ranging  
599 between 96 and 100% (Table S1), demonstrating the validity of our protocol. Therefore, a  
600 loss of iron pools such as magnetite could not explain our results.

601

## 602 **Cell counting**

603 To further demonstrate that wild-type AMB-1 incorporates more iron than needed to make its  
604 magnetite crystals, we chose an alternative approach to estimate the mean mass of magnetite  
605 per cell and to compare these results with available data on single-cell bulk iron content in  
606 AMB-1. Additional wild-type AMB-1 cultures (two replicates) were grown with Fe(III)-  
607 citrate at 150  $\mu\text{M}$ . For each culture, the entire AMB-1 population was recovered with  
608 centrifugation, and the total mass of magnetite in a given population was determined from  
609 magnetic measurements as described above. The number of cells in the same populations was  
610 then calculated from direct cell counting using a hemocytometer under a light microscope.

611 Fifty counts were done for each AMB-1 culture. Finally, the mean mass of iron per cell was  
612 calculated from the total number of cells and the total mass of magnetite in each culture.

613

### 614 **Detection and mapping of labile Fe(II) in AMB-1 using the FIP-1 fluorescent probe**

615 The sensing mechanism for FIP-1 is inspired by antimalarial natural products and related  
616 therapeutics (Borstnik et al, 2002; Tang et al, 2005; Creek et al, 2007; Spangler et al, 2016).  
617 This reagent has been developed for use in mammalian cells and expanded in bioluminescent  
618 versions for mouse imaging (Aaron *et al*, 2017). We adapted the use of FIP-1 (Aron *et al*,  
619 2016) for detection of Fe(II) in AMB-1. Wild-type and mutant AMB-1 strains were cultivated  
620 in 10 mL glass tubes until end of exponential phase / beginning of the stationary phase. Ten  
621 mL of growth medium were centrifuged, the supernatant was discarded, and cells were  
622 resuspended in 500  $\mu$ L of PBS buffer. To ensure that all iron from the growth medium is  
623 removed, cells were centrifuged and washed in fresh PBS buffer three times. Finally, the three  
624 bacterial strains were mixed with a PBS solution containing EDTA (5mM, pH 6.9) for 10 min,  
625 centrifuged, and suspended in the FIP-1 solution (*i.e* FIP-1 at 1 mM in Hank's Balance Salt  
626 Solution) for 180 min at 30°C in the glove box (90% N<sub>2</sub>, 10% O<sub>2</sub>). All bacterial samples were  
627 observed by Structured Illumination Microscopy with a Carl Zeiss Elyra PS.1 Super  
628 Resolution fluorescence microscope, using red (excitation wavelength of 561 nm, emission  
629 wavelength of 570-620 nm) and green (excitation wavelength of 488 nm, emission  
630 wavelength of 495-550 nm) laser lines for the detection of the native and cleaved probe,  
631 respectively. Images were processed with the ImageJ software.

632

### 633 **ACKNOWLEDGMENTS**

634 AK and MA are supported by grants through the National Science Foundation (1504681) and  
635 National Institute of Health (R01GM084122 and R35GM127114). AC, CS and FH were

636 supported by the Director, office of Science, Office of Basic Energy Sciences, Materials  
637 Sciences and Engineering Division, of the U.S. Department of Energy under Contract No.  
638 DE-AC02-05-CH11231 within the Nonequilibrium Magnetic Materials Program (KC2204).  
639 CJC and ATA were supported by a grant from the National Institute of Health  
640 (R01GM079465). CJC is a CIFAR Senior Fellow. ATA thanks the NSF for a graduate  
641 fellowship and was partially supported by an NIH Chemical Biology Interface Training Grant  
642 (T32 GM066698). We thank Mickaël Tharaud for assistance with mass spectrometry analyses.  
643 Part of this work was supported by IPGP multidisciplinary program PARI and by Region Ile-  
644 de-France SESAME Grant no. 12015908.

## 645 **References**

- 646 Aharoni A. (2000) Introduction to the theory of ferromagnetism. Oxford University Press,  
647 Oxford.
- 648 Alberge F., Espinosa L., Seduk F., Sylvi L., Toci R., Walburger A., Magalon A. (2015)  
649 Dynamic subcellular localization of a respiratory complex controls bacterial respiration.  
650 *eLife* **4**, #e05357 doi: 10.7554/eLife.05357.
- 651 Amor M., Tharaud M., Gélabert A., Komeili A. (2019) Single-cell determination of iron  
652 content in magnetotactic bacteria: implications for the iron biogeochemical cycle. *Environ.*  
653 *Microbiol.* In press. <https://doi.org/10.1111/1462-2920.14708>.
- 654 Amor M., Busigny V., Louvat P., Tharaud M., Gélabert A., Cartigny P., Carlut J., Isambert A.,  
655 Durand-Dubief M., Ona-Nguema G., Alphanbéry E., Chebbi I., Guyot F. (2018) Iron  
656 uptake and magnetite biomineralization in the magnetotactic bacterium *Magnetospirillum*  
657 *magneticum* strain AMB-1: an iron isotope study. *Geochim. Cosmochim. Acta* **232**, 225-  
658 243.
- 659 Amor M., Busigny V., Louvat P., Gélabert A., Cartigny P., Durand-Dubief M., Ona-Nguema  
660 G., Alphanbéry E., Chebbi I., Guyot F. (2016) Mass-dependent and -independent signature  
661 of Fe isotopes in magnetotactic bacteria. *Science* **352**, 705-708.
- 662 Andrews S. C., Robinson A. K., Rodríguez-Quñones F. (2003) Bacterial iron homeostasis.  
663 *FEMS Microbiol. Rev.* **27**, 215-237.
- 664 Arakaki A., Kikuchi D., Tanaka M., Yamagishi A., Yoda T., Matsunaga T. (2016)  
665 Comparative subcellular localization analysis of magnetosome proteins reveals a unique  
666 localization behavior of Mms6 protein onto magnetite crystals. *J. Bacteriol.* **198**, 2794-  
667 2802.

- 668 Aron A. T., Loehr M. O., Bogena J., Chang C. J. (2016) An endoperoxide reactivity-based  
669 FRET Probe for ratiometric fluorescence imaging of labile iron pools in living cells. *J. Am.*  
670 *Chem. Soc.* **138**, 14338-14346.
- 671 Aron A. T., Heffern M. C., Lonergan Z. R., Vander Wal M. N., Blank B. R., Spangler B.,  
672 Zhang Y., Park H. M., Stahl A., Renslo A. R., Skaar E. P., Chang C. J. (2017) *In vivo*  
673 bioluminescence imaging of labile iron accumulation in a murine model of *Acinobacter*  
674 *baumannii* infection. *Proc. Natl. Acad. Sci. U. S. A.* **114**, 12669-12674.
- 675 Baumgartner J., Morin G., Menguy N., Perez Gonzalez T., Widdrat M., Cosmidis J., Faivre D.  
676 (2013) Magnetotactic bacteria form magnetite from a phosphate-rich ferric hydroxide via  
677 nanometric ferric (oxyhydr)oxide intermediates. *Proc. Natl. Acad. Sci. U. S. A.* **110**,  
678 14883-14888.
- 679 Berny C., Le Fèvre R., Guyot F., Blondeau K., Guizonne C., Rousseau E., Bayan N.,  
680 Alphanéry E. (2020) A method for producing highly pure magnetosomes in large quantity  
681 for medical applications using *Magnetospirillum gryphiswaldense* MSR-1 magnetotactic  
682 bacteria amplified in minimal growth media. *Front. Bioeng. Biotechnol.* **8**, 16. Doi:  
683 10;3389/fbioe.2020.00016.
- 684 Borstnik K., Paik I. H., Shapiro T. A., Posner G. H. (2002) Antimalarial chemotherapeutic  
685 peroxides: artemisinin, yingzhaosu A and related compounds. *Int. J. Parasitol.* **32**, 1661-  
686 1667.
- 687 Cornell R. M., Schwertmann U. (2013) The iron oxides: structure, properties, reactions,  
688 occurrences and uses, second edition. Wiley-VCH Verlag GmbH & Co. KGaA.
- 689 Creek D. J., Charman W. N., Chiu F. C., Pranker R. J., McCullough K. J., Dong Y.,  
690 Vennerstrom J. L., Charman S. A. (2007) Iron-mediated degradation kinetics of substituted  
691 dispiro-1,2,4-trioxolane antimalarials. *J. Pharm. Sci.* **96**, 2945-2956.

- 692 Cunrath O., Gasser V., Hoegy F., Reimann C., Guillon L., Schalk I. J. (2015) A cell  
693 biological view of the siderophore pyochelin iron uptake pathway in *Pseudomonas*  
694 *aeruginosa*. *Environ. Microbiol.* **17**, 171-185.
- 695 Dunlop D. J. (2002) Theory and application of the Day plot ( $M_{rs}/M_s$  versus  $H_{cr}/H_c$ ): 1/  
696 Theoretical curves and tests using titanomagnetite data. *J. Geophys. Res.* **107**, doi:  
697 10.1029/2001JB000486.
- 698 Faivre D., Böttger L. H., Matzanke B. F., Schüler D. (2007) Intracellular magnetite  
699 biomineralization in bacteria proceeds by a distinct pathway involving membrane-bound  
700 ferritin and an iron(II) species. *Ang. Chem. Int. Ed.* **46**, 8495-8499.
- 701 Fdez-Gubieda M. L., Muela A., Alonso J., García-Prieto A., Olivi L., Fernández-Pacheco R.,  
702 Barandiarán J. M. (2013) Magnetite biomineralization in *Magnetospirillum*  
703 *gryphiswaldense*: time-resolved magnetic and structural studies. *ACS Nano* **7**, 3297-3305.
- 704 Frankel R. B., Papaefthymiou G. C., Blakemore R. P., O'Brien W. (1983)  $Fe_3O_4$  precipitation  
705 in magnetotactic bacteria. *Biochim. Biophys. Acta.* **763**, 147-159.
- 706 Freer W., O'Reilly R. (1980) The diffusion of  $Fe^{2+}$  ions in spinels with relevance to the  
707 process of maghemitization. *Mineral. Mag.* **43**, 889-899.
- 708 Gallagher K. J., Feitknecht W., Mannweiler U. (1968) Mechanism of oxidation of magnetite  
709 to  $\gamma-Fe_2O_3$ . *Nature* **217**, 1118-1121.
- 710 Gasser V., Guillon L., Cunrath O., Schalk I. J. (2015) Cellular organization of siderophore  
711 biosynthesis in *Pseudomonas aeruginosa*: evidence for siderosomes. *J. Inorg. Biochem.*  
712 **148**, 27-34.
- 713 Hunter R. C., Asfour F., Dingemans J., Osuna B. L., Samad T., Malfroot A., Cornelis P.,  
714 Newman D. K. (2013) Ferrous iron is a significant component of bioavailable iron in  
715 cystic fibrosis airways. *mBio* **4**, e00557-13.

- 716 Jones S. R., Wilson T. D., Brown M. E., Rahn-Lee L., Yu Y., Fredriksen L. L., Ozyamak E.,  
717 Komeili A., Chang M. C. Y. (2015) Genetic and biochemical investigations of the role of  
718 MamP in redox control of iron biomineralization in *Magnetospirillum magneticum*. *Proc.*  
719 *Natl. Acad. Sci. U. S. A.* **112**, 3904-3909.
- 720 Komeili A., Li Z., Newman D. K., Jensen G. J. (2006) Magnetosomes are cell membrane  
721 invaginations organized by the actin-like protein MamK. *Science* **31**, 242-245.
- 722 Komeili A., Vali H., Beveridge T. J., Newmann D. K. (2004) Magnetosome formation are  
723 present before magnetite formation, and MamA is required for their activation. *Proc. Natl.*  
724 *Acad. Sci. U. S. A.* **101**, 3839-3844.
- 725 Kopp R. E., Kirschvink J. L. (2008) The identification and biogeochemical interpretation of  
726 fossil magnetotactic bacteria. *Earth-Sci. Rev.* **86**, 42-61.
- 727 Larrasoaña J. C., Liu Q., Hu P., Roberts A. P., Mata P., Civis J., Sierro F. J., Pérez-Asensio J.  
728 N. (2014) Paleomagnetic and paleoenvironmental implications of magnetofossil  
729 occurrences in late Miocene marine sediments from the Guadalquivir basin, SW Spain.  
730 *Front. Microbiol.* **5**, #71 doi: 10.3389/fmicb.2014.00071.
- 731 Li J., Pan Y., Chen G., Liu Q., Tian L., Lin W. (2009) Magnetite magnetosome and  
732 fragmental chain formation of *Magnetospirillum magneticum* AMB-1: transmission  
733 electron microscopy and magnetic observations. *Geophys. J. Int.* **177**, 33-42.
- 734 Li J., Wu W., Liu Q., Pan Y. (2012) Magnetic anisotropy, magnetostatic interactions and  
735 identification of magnetofossils. *Geochem. Geophys. Geosyst.* **13**, #Q10Z51. doi:  
736 10.1029/2012GC004384.
- 737 Lin W., Bazylinski D. A., Xiao T., Wu L.-F., Pan Y. (2014) Life with compass: diversity and  
738 biogeography of magnetotactic bacteria. *Environ. Microbiol.* **16**, 2646-2658.

- 739 McCausland H. C., Komeili A. (2020) Magnetic genes: studying the genetics of  
740 biomineralization in magnetotactic bacteria. *PLoS Genet.* **16**, e1008499. Doi:  
741 10.1371/journal.pgen.1008499.
- 742 Meister M. (2016) Physical limits to magnetogenetics. *eLife* **5**, e17210. doi:  
743 10.7554/eLife.17210.
- 744 Müller F., Raschdorf O., Nudelman H., Messerer M., Katzmann E., Plitzko J. M., Zarivach R.,  
745 Schüler D. (2013) The FtsZ-like protein FtsZm of *Magnetospirillum gryphiswaldense*  
746 likely interacts with its generic homolog and is required for biomineralization under nitrate  
747 deprivation. *J. Bacteriol.* **196**, 650-659.
- 748 Murat D., Quinlan A., Vali H., Komeili A. (2010) Comprehensive genetic dissection of the  
749 magnetosome gene island reveals the step-wise assembly of a prokaryotic organelle. *Proc.*  
750 *Natl. Acad. Sci. U. S. A.* **107**, 5593-5598.
- 751 Muxworthy A. R., Williams W. (2009) Critical superparamagnetic/single-domain grain sizes  
752 in interacting magnetite particles: implications for magnetosome crystals. *J. R. Soc.*  
753 *Interface* **6**, 1207-1212.
- 754 Popp F., Armitage J. P., Schüler D. (2014) Polarity of bacterial magnetotaxis is controlled by  
755 aerotaxis through a common sensory pathway. *Nat. Commun.* **5**, #5398 doi:  
756 10.1038/ncomms6398.
- 757 Rebodos R. L., Vikesland P. J. (2010) Effects of oxidation on the magnetization of  
758 nanoparticulate magnetite. *Langmuir* **26**, 16745-16753.
- 759 Rong C., Zhang C., Zhang Y., Qi L., Yang J., Guan G., Li Y., Li J. (2012) FeoB2 functions in  
760 magnetosome formation and oxidative stress protection in *Magnetospirillum*  
761 *gryphiswaldense* strain MSR-1. *J. Bacteriol.* **194**, 3972-3976.



- 762 Rong C., Huang Y., Zhang W., Jiang W., Li Y., Li J. (2008) Ferrous iron transport protein B  
763 gene (*feoB1*) plays an accessory role in magnetosome formation in *Magnetospirillum*  
764 *gryphiswaldense* strain MSR-1. *Res. Microbiol.* **159**, 530-536.
- 765 Siponen M. I., Legrand P., Widdrat M., Jones S. R., Zhang W.-J., Chang M. C. Y., Faivre D.,  
766 Arnoux P., Pignol D. (2013) Structural insight into magnetochrome-mediated magnetite  
767 biomineralization. *Nature* **502**, 681-684.
- 768 Spangler B., Morgan C. W., Fontaine S. D., Vander Wal M. N., Chang C. J., Wells J. A.,  
769 Rensio A. R. (2016) A reactivity-based probe of the intracellular labile ferrous iron pool.  
770 *Nat. Chem. Biol.* **12**, 680-685.
- 771 Suzuki T., Okamura Y., Calugay R. J., Takeyama H., Matsunaga T. (2006) Global gene  
772 expression analysis of iron-inducible genes in *Magnetospirillum magneticum* AMB-1. *J.*  
773 *Bacteriol.* **188**, 2275-2279.
- 774 Tang Y. Q., Dong Y. X., Wang X. F., Sriraghavan K., Wood J. K., Vennerstrom J. L. (2005)  
775 Dispiro-1,2,4-trioxane analogues of a prototype dispiro-1,2,4-trioxolane: mechanistic  
776 comparators for artemisinin in the context of reaction pathways with iron(II). *J. Org. Chem.*  
777 **70**, 5103-5110.
- 778 Towe K. M., Bradley W. F. (1967) Mineralogical constitution of colloidal 'hydrous ferric  
779 oxides". *J. Colloid. Interf. Sci.* **24**, 384-392.
- 780 Uebe R., Ahrens F., Stang J., Jäger K., Böttger L. H., Schmidt C., Matzanke B. F., Schüler D.  
781 (2019) Bacterioferritin of *Magnetospirillum gryphiswaldense* is a heterotetraecicosameric  
782 complex composed of functionally distinct subunits but is not involved in magnetite  
783 biomineralization. *mBio* **10**, #e02795-18 doi: 10.1128/mBio.02795-18.
- 784 Uebe R., Schüler D. (2016) Magnetosome biogenesis in magnetotactic bacteria. *Nature Rev.*  
785 *Microbiol.* **14**, 621-637.

- 786 Uebe R., Voigt B., Schweder T., Albrecht D., Katzmann E., Lang C., Böttger L., Matzanke B.,  
787 Schüler D. Deletion of a *fur*-like gene affects iron homeostasis and magnetosome  
788 formation in *Magnetospirillum gryphiswaldense*. *J. Bacteriol.* **192**, 4192-4204.
- 789 Wang Q., Wang X., Zhang W., Li X., Zhou Y., Li D., Wang Y., Tian J., Jiang W., Zhang Z.,  
790 Peng Y., Wang L., Li Y., Li J. (2017) Physiological characteristics of *Magnetospirillum*  
791 *gryphiswaldense* MSR-1 that control cell growth under high-iron and low-oxygen  
792 conditions. *Sci. Rep.* **7**: 2800. Doi: 10.1038/s41598-017-03012-4.
- 793 Wang X., Zhu M., Koopal L. K., Li W., Xu W., Liu F., Zhang J., Liu Q., Feng X., Sparks D.  
794 L. (2016) Effects of crystallite size on the structure and magnetism of ferrihydrite. *Environ.*  
795 *Sci.: Nano.* **3**, 190-202.
- 796 Werckmann J., Cypriano J., Lefèvre C. T., Dembelé K., Ersen O., Bazylnski D. A., Lins U.,  
797 Farina M. (2017) Localized iron accumulation precedes nucleation and growth of  
798 magnetite crystals in magnetotactic bacteria. *Sci. Rep.* **7**, #8290 doi:10.1038/s41598-017-  
799 08994-9.
- 800 Zaitsev V. S., Filimonov D. S., Presnyakov I. A., Gambino R. J., Chu B. (1999) Physical and  
801 chemical properties of magnetite and magnetite-polymer nanoparticles and their colloidal  
802 dispersions. *J. Colloid Interface Sci.* **212**, 49-57.
- 803 Zuoquan Z., Sun Q., Zhong J., Qihua Y., Li H., Cheng D., Liang B., Shuai X. (2014)  
804 Magnetic resonance imaging-visible and pH-sensitive polymeric micelles for tumor  
805 targeted drug delivery. *J. Biomed. Nanotechnol.* **10**, 216-226.

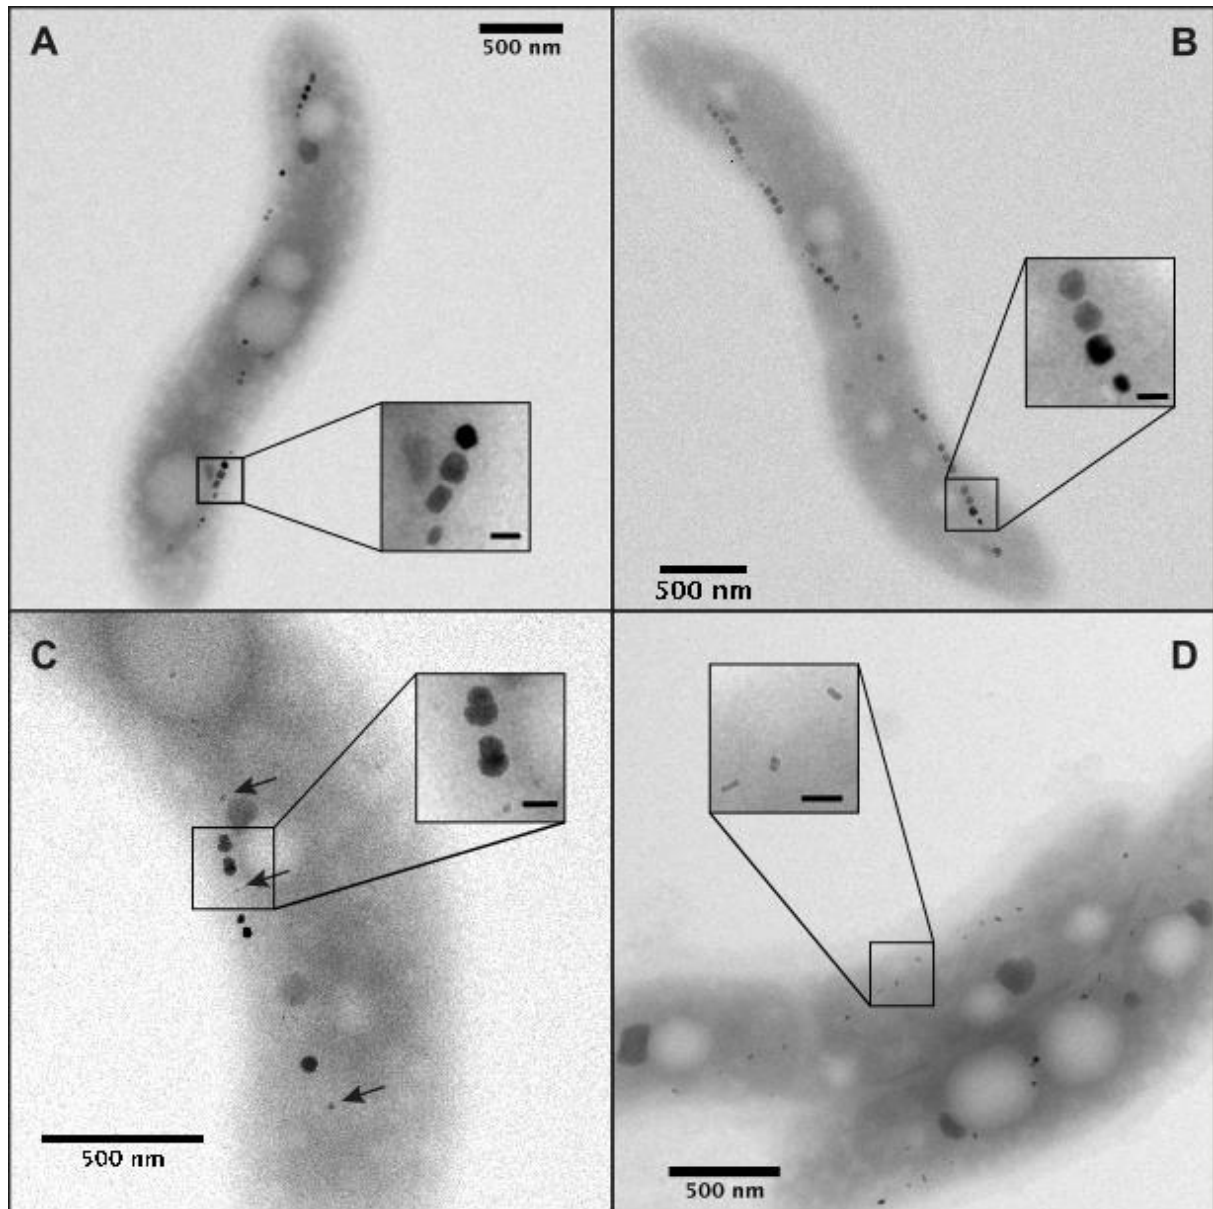

806

807 **FIG 1** Transmission electron observations of wild-type AMB-1 cells cultivated for three days  
808 with initial iron concentrations in the growth medium of (A) 30 or (B) 150  $\mu\text{M}$ , and (C)  
809  $\Delta mamP$  and (D)  $\Delta mamT\Delta R9$  (referred to as  $\Delta mamT$ ) AMB-1 strains cultivated with Fe(III)-  
810 citrate at 150  $\mu\text{M}$ . Arrows in (C) indicate small nanoparticles produced by the  $\Delta mamP$   
811 bacteria. Scale bars (insets) = 50 nm.

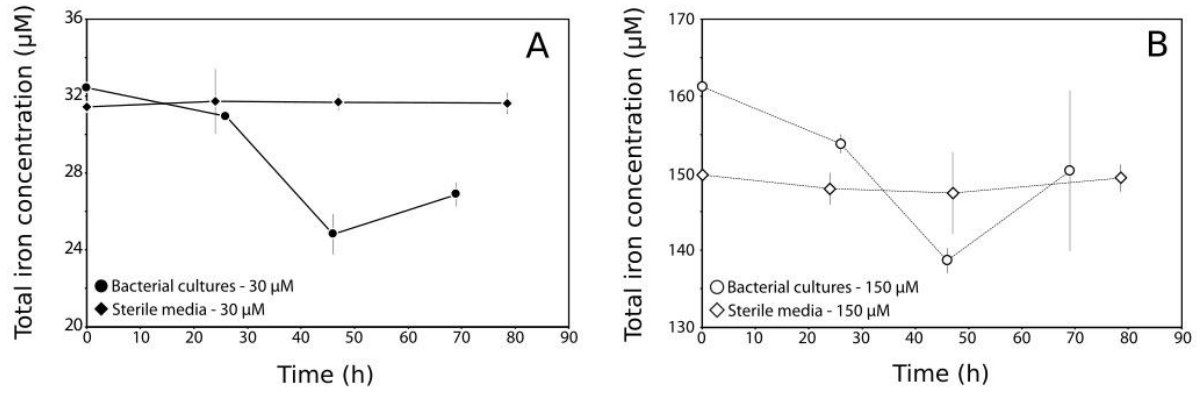

812

813 **FIG 2** Total iron concentration in (circles) AMB-1 and (diamonds) sterile media provided

814 with iron at (A) 30 or (B) 150 μM. Each point corresponds to the mean value of 3 replicates ±

815 1SD. Note the different y-axes.

816

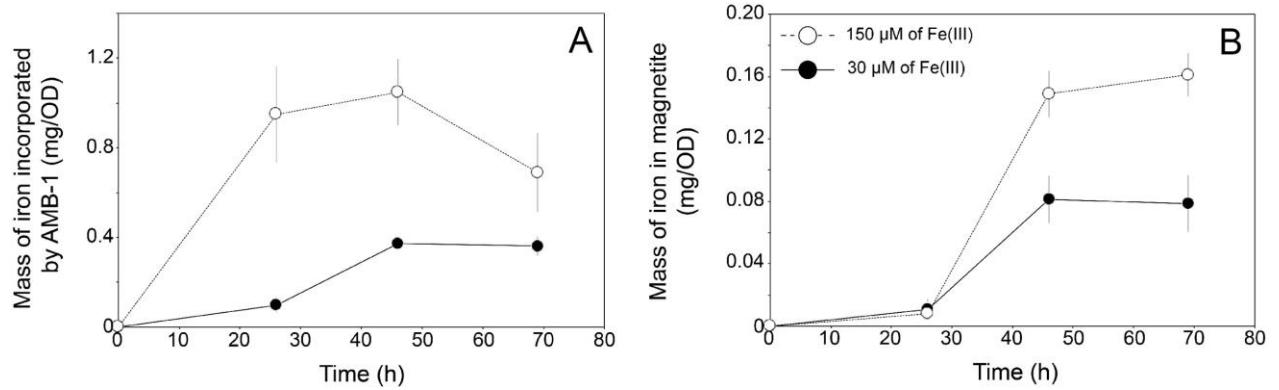

817

818 **FIG 3** Mass of iron (A) taken up by AMB-1 and (B) contained in magnetite during bacterial  
819 growth. All values are normalized to optical densities (OD), which is proportional to the cell  
820 biomass. Thus, different cell densities cannot explain discrepancies in iron uptake. Each point  
821 corresponds to the mean value of three replicates  $\pm$  1SD. Note the different y-axes. Black  
822 circles and open symbols refer to cultures with an initial iron concentration of 30 and 150  $\mu$ M,  
823 respectively.

824

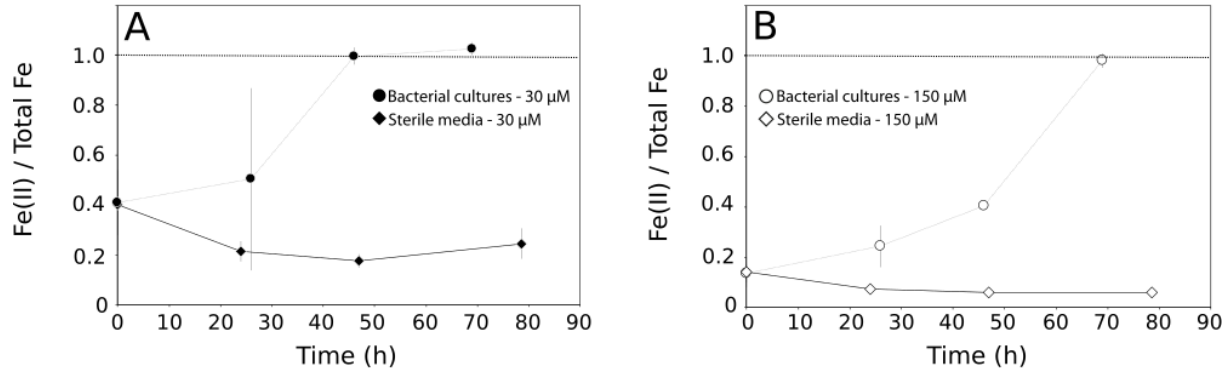

825

826 **FIG 4** Iron speciation in (circles) AMB-1 and (diamonds) sterile media provided with iron at  
827 (A) 30 or (B) 150 μM. Each point corresponds to the mean value of 3 replicates ± 1SD.

828

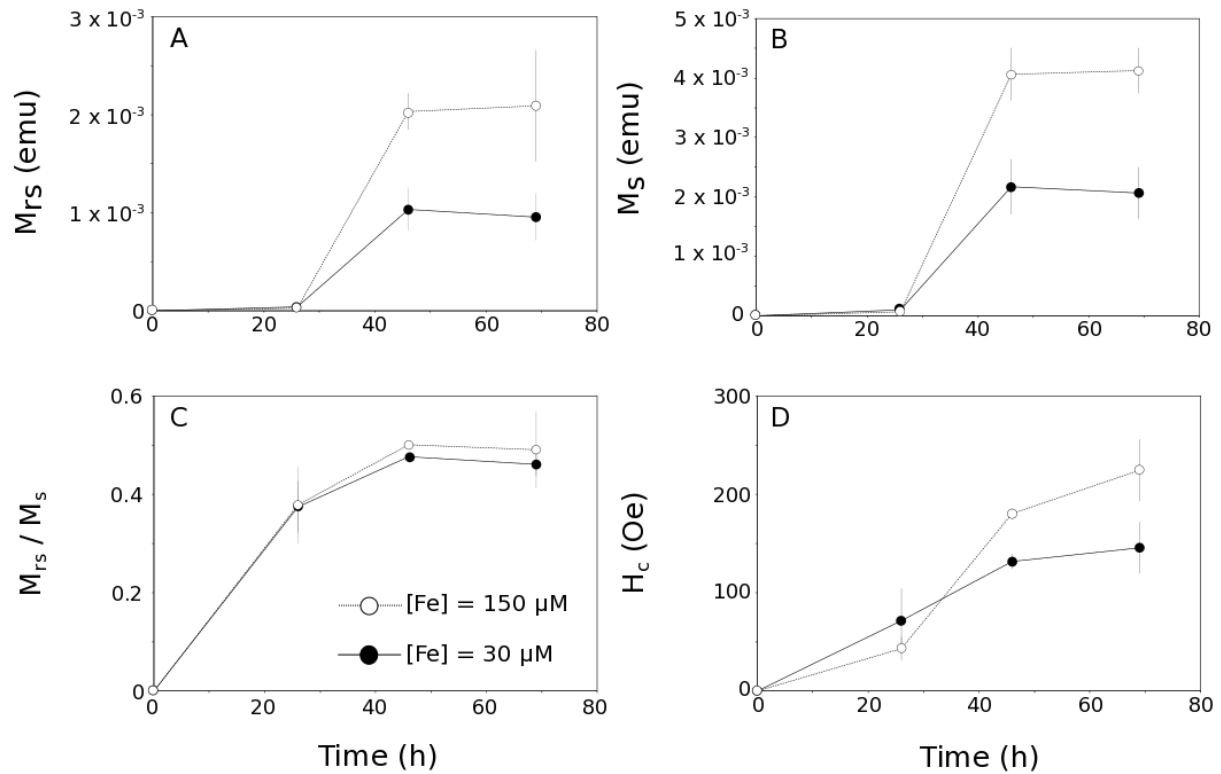

829

830 **FIG 5** (A) Remanent magnetization ( $M_{rs}$ ), (B) saturation magnetization ( $M_s$ ), (C) coercivity  
831 ( $H_c$ ) and (D)  $M_{rs} / M_s$  ratios for the studied AMB-1 cultures. Each point corresponds to the  
832 mean value of three replicates  $\pm 1\text{SD}$ . Black circles and open symbols refer to cultures with  
833 an initial iron concentration of 30 and 150  $\mu\text{M}$ , respectively.

834

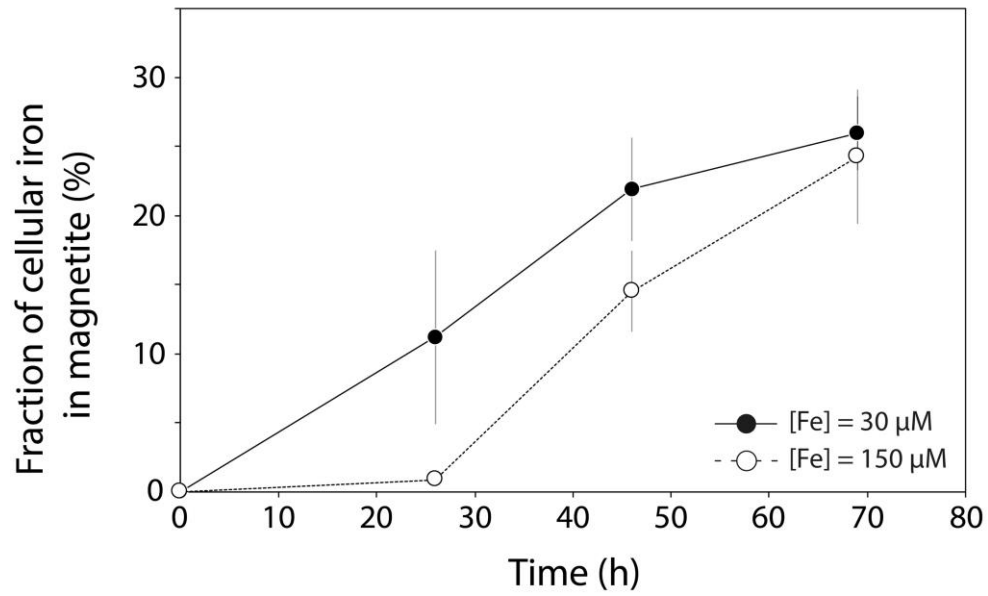

835

836 **FIG 6** Relative fraction of the total cellular iron contained in magnetite. Each point  
837 corresponds to the mean value of three replicates  $\pm$  1SD. Black circles and open symbols refer  
838 to cultures with an initial iron concentration of 30 and 150  $\mu$ M, respectively.

839



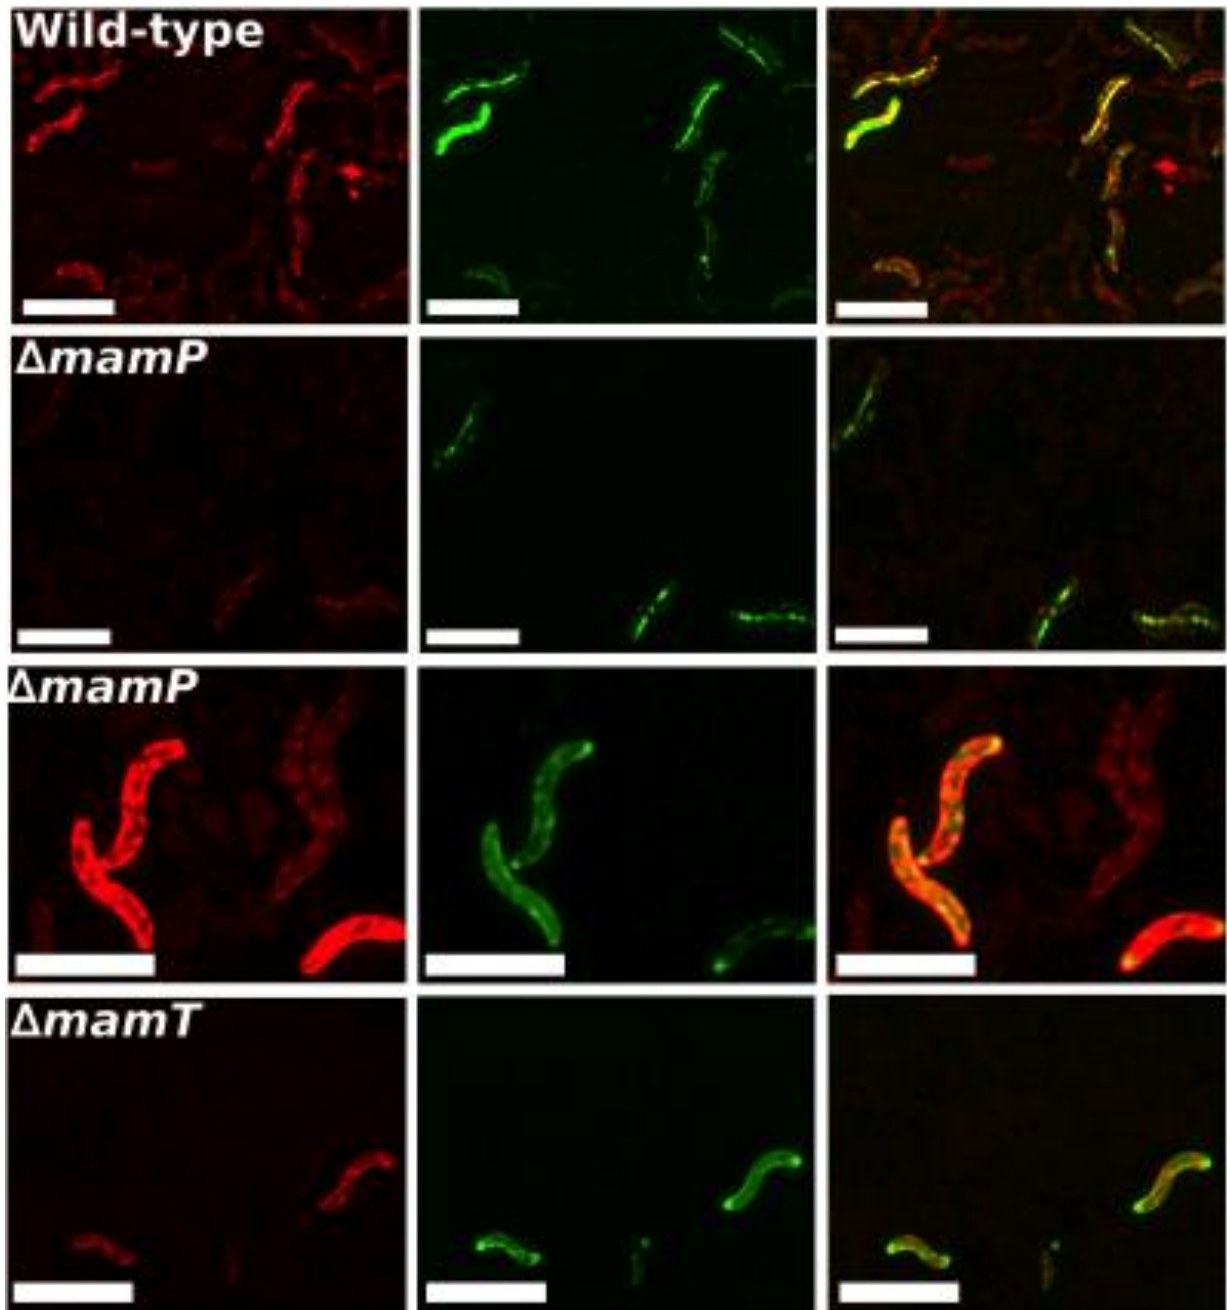

840

841 **FIG 7** Red (left panels), green (center panels) and merged (right panels) fluorescence images  
842 of wild-type,  $\Delta mamP$  and  $\Delta mamT$  AMB-1 incubated with FIP-1 for 180 min. The two  
843  $\Delta mamP$  panels show the two fluorescence patterns (diffuse and located to the magnetosome  
844 chains, as in wild-type) observed in the populations. Scale bars = 4 microns. Additional  
845 pictures are available in the supplementary materials.

846 **Table 1** Fe(II) and total iron concentration in initial and final sterile growth media.  
847

| Time of culture (h)                        | Volume of culture (mL) | Initial [Fe(II)] ( $\mu\text{M}$ ) | Initial [Fe] ( $\mu\text{M}$ ) | Final [Fe(II)] ( $\mu\text{M}$ ) | Final [Fe] ( $\mu\text{M}$ ) |
|--------------------------------------------|------------------------|------------------------------------|--------------------------------|----------------------------------|------------------------------|
| <b>[Fe] = 30 <math>\mu\text{M}</math></b>  |                        |                                    |                                |                                  |                              |
| 24 #1                                      | 190                    | 21.41                              | 33.07                          | 8.53                             | 33.59                        |
| 24 #2                                      | 190                    | 18.97                              | 31.50                          | 6.61                             | 30.28                        |
| 24 #3                                      | 190                    | 18.27                              | 32.02                          | 5.39                             | 31.33                        |
| 47 #1                                      | 190                    | 14.44                              | 30.46                          | 6.70                             | 32.10                        |
| 47 #2                                      | 190                    | 12.18                              | 32.20                          | 5.29                             | 31.22                        |
| 47 #3                                      | 190                    | 11.14                              | 30.46                          | 4.94                             | 31.75                        |
| 78.5 #1                                    | 190                    | 8.70                               | 31.15                          | 9.88                             | 31.22                        |
| 78.5 #2                                    | 190                    | 5.22                               | 30.98                          | 6.88                             | 32.28                        |
| 78.5 #3                                    | 190                    | 4.35                               | 31.15                          | 6.53                             | 31.39                        |
| <b>[Fe] = 150 <math>\mu\text{M}</math></b> |                        |                                    |                                |                                  |                              |
| 24 #1                                      | 190                    | 33.07                              | 151.58                         | 11.83                            | 146.53                       |
| 24 #2                                      | 190                    | 29.59                              | 151.06                         | 10.44                            | 149.49                       |
| 24 #3                                      | 190                    | 30.63                              | 150.71                         | -                                | -                            |
| 47 #1                                      | 190                    | 24.02                              | 152.45                         | 10.93                            | 153.27                       |
| 47 #2                                      | 190                    | 22.28                              | 139.57                         | 8.64                             | 146.39                       |
| 47 #3                                      | 190                    | 19.14                              | 151.41                         | 7.05                             | 142.68                       |
| 78.5 #1                                    | 190                    | 12.53                              | 153.49                         | 10.41                            | 147.80                       |
| 78.5 #2                                    | 190                    | 11.66                              | 149.49                         | 9.70                             | 149.03                       |
| 78.5 #3                                    | 190                    | 8.70                               | 148.45                         | 7.58                             | 151.33                       |

848

849 **Table 2** Fe(II) and total iron concentration in the growth medium before and after AMB-1 cultures,  
 850 and final optical density at 400 nm (OD<sub>400nm</sub>) and pH values of bacterial cultures (starting pH = 6.9).  
 851

| Time of culture (h)  | Volume of culture (mL) | Initial [Fe(II)] (μM) | Initial [Fe] (μM) | Final OD <sub>400nm</sub> (AU) | Final pH | Final [Fe(II)] (μM) | Final [Fe] (μM) |
|----------------------|------------------------|-----------------------|-------------------|--------------------------------|----------|---------------------|-----------------|
| <b>[Fe] = 30 μM</b>  |                        |                       |                   |                                |          |                     |                 |
| 26 #1                | 185                    | 16.87                 | 31.36             | 0.067                          | 6.95     | 7.29                | 30.94           |
| 26 #2                | 185                    | 17.24                 | 31.72             | 0.060                          | 6.91     | 11.03               | 30.94           |
| 26 #3                | 185                    | 17.05                 | 31.72             | 0.083                          | 7.01     | 28.45               | 30.94           |
| 46 #1                | 185                    | 14.12                 | 32.46             | 0.209                          | 7.26     | 24.99               | 24.30           |
| 46 #2                | 185                    | 13.94                 | 32.82             | 0.202                          | 7.34     | 24.99               | 26.03           |
| 46 #3                | 185                    | 14.85                 | 31.72             | 0.214                          | 7.26     | 24.12               | 24.12           |
| 69 #1                | 185                    | 8.80                  | 33.19             | 0.212                          | 7.42     | 28.12               | 27.42           |
| 69 #2                | 185                    | 8.44                  | 33.19             | 0.203                          | 7.44     | 28.47               | 27.07           |
| 69 #3                | 185                    | 7.52                  | 33.74             | 0.204                          | 7.42     | 26.20               | 26.20           |
| <b>[Fe] = 150 μM</b> |                        |                       |                   |                                |          |                     |                 |
| 26 #1                | 185                    | 29.16                 | 162.65            | 0.069                          | 7.03     | 51.57               | 154.89          |
| 26 #2                | 185                    | 26.96                 | 157.15            | 0.067                          | 6.94     | 35.21               | 152.40          |
| 26 #3                | 185                    | 26.41                 | 159.35            | 0.056                          | 6.94     | 25.96               | 154.18          |
| 46 #1                | 185                    | 26.77                 | 161.00            | 0.215                          | 7.18     | 57.80               | 140.24          |
| 46 #2                | 185                    | 23.29                 | 158.25            | 0.215                          | 7.28     | 54.15               | 138.85          |
| 46 #3                | 185                    | 20.90                 | 161.73            | 0.211                          | 7.30     | 56.58               | 136.94          |
| 69 #1                | 185                    | 15.95                 | 160.27            | 0.197                          | 7.48     | 143.39              | 146.88          |
| 69 #2                | 175                    | 15.95                 | 172.00            | 0.202                          | 7.50     | 154.57              | 162.08          |
| 69 #3                | 185                    | 14.12                 | 158.80            | 0.202                          | 7.50     | 143.74              | 141.99          |

852  
 853

854 **Table 3** Fe(II) and total iron concentration in the growth medium before and after mutant AMB-1  
855 cultures, and final optical density at 400 nm (OD<sub>400nm</sub>) and pH values of bacterial cultures (starting pH  
856 = 6.9). Additional wild-type cultures were used as a control condition.  
857

| Time of culture (h) | Volume of culture (mL) | Initial [Fe(II)] (μM) | Initial [Fe] (μM) | Final OD <sub>400nm</sub> (AU) | Final pH | Final [Fe(II)] (μM) | Final [Fe] (μM) |
|---------------------|------------------------|-----------------------|-------------------|--------------------------------|----------|---------------------|-----------------|
| <b>Wild-type</b>    |                        |                       |                   |                                |          |                     |                 |
| 43 #1               | 178                    | 25.08                 | 150.30            | 0.250                          | 7.30     | 26.23               | 145.78          |
| 43 #2               | 173                    | 22.85                 | 155.69            | 0.252                          | 7.24     | 25.23               | 150.59          |
| 43 #3               | 167                    | 23.22                 | 164.05            | 0.255                          | 7.40     | 19.42               | 151.99          |
| <b>Δ<i>mamP</i></b> |                        |                       |                   |                                |          |                     |                 |
| 43 #1               | 171                    | 21.55                 | 159.59            | 0.261                          | 7.32     | 21.43               | 158.20          |
| 43 #2               | 174                    | 19.32                 | 161.27            | 0.252                          | 7.35     | 18.23               | 161.00          |
| 43 #3               | 170                    | 18.21                 | 162.75            | 0.261                          | 7.33     | 14.42               | 159.20          |
| <b>Δ<i>mamT</i></b> |                        |                       |                   |                                |          |                     |                 |
| 43 #1               | 175                    | 16.72                 | 157.92            | 0.248                          | 7.34     | 15.02               | 158.20          |
| 43 #2               | 177                    | 15.42                 | 153.23            | 0.280                          | 7.35     | 15.62               | 148.29          |
| 43 #3               | 164                    | 14.31                 | 169.44            | 0.252                          | 7.39     | 10.21               | 172.22          |

858

859 **Table 4** Remanent magnetization ( $M_{rs}$ ), saturation magnetization ( $M_s$ ), coercivity ( $H_c$ ) and  
 860  $M_{rs}/M_s$  ratios of wild-type AMB-1.  
 861

| Time of culture (h)                 | $M_{rs}$ (emu)        | $M_s$ (emu)           | $H_c$ (Oe) | $M_{rs}/M_s$ |
|-------------------------------------|-----------------------|-----------------------|------------|--------------|
| <b>[Fe] = 30 <math>\mu</math>M</b>  |                       |                       |            |              |
| 26 #1                               | $1.74 \times 10^{-5}$ | $4.06 \times 10^{-5}$ | 75.50      | 0.43         |
| 26 #2                               | $2.55 \times 10^{-5}$ | $7.88 \times 10^{-5}$ | 37.02      | 0.32         |
| 26 #3                               | $7.03 \times 10^{-5}$ | $1.89 \times 10^{-4}$ | 102.17     | 0.37         |
| 46 #1                               | $1.08 \times 10^{-3}$ | $2.23 \times 10^{-3}$ | 138.02     | 0.48         |
| 46 #2                               | $8.00 \times 10^{-4}$ | $1.68 \times 10^{-3}$ | 123.28     | 0.48         |
| 46 #3                               | $1.22 \times 10^{-3}$ | $2.60 \times 10^{-3}$ | 134.23     | 0.47         |
| 69 #1                               | $6.80 \times 10^{-4}$ | $1.57 \times 10^{-3}$ | 115.97     | 0.43         |
| 69 #2                               | $1.07 \times 10^{-3}$ | $2.24 \times 10^{-3}$ | 156.12     | 0.48         |
| 69 #3                               | $1.12 \times 10^{-3}$ | $2.39 \times 10^{-3}$ | 164.70     | 0.47         |
| <b>[Fe] = 150 <math>\mu</math>M</b> |                       |                       |            |              |
| 26 #1                               | $5.19 \times 10^{-5}$ | $1.12 \times 10^{-4}$ | 56.81      | 0.46         |
| 26 #2                               | $1.99 \times 10^{-5}$ | $6.42 \times 10^{-5}$ | 34.87      | 0.31         |
| 26 #3                               | $1.15 \times 10^{-5}$ | $3.18 \times 10^{-5}$ | 37.50      | 0.36         |
| 46 #1                               | $2.23 \times 10^{-3}$ | $4.52 \times 10^{-3}$ | 186.19     | 0.49         |
| 46 #2                               | $2.01 \times 10^{-3}$ | $4.03 \times 10^{-3}$ | 175.58     | 0.50         |
| 46 #3                               | $1.86 \times 10^{-3}$ | $3.64 \times 10^{-3}$ | 179.27     | 0.51         |
| 69 #1                               | -                     | -                     | -          | -            |
| 69 #2                               | $1.69 \times 10^{-3}$ | $3.89 \times 10^{-3}$ | 202.27     | 0.43         |
| 69 #3                               | $2.49 \times 10^{-3}$ | $4.57 \times 10^{-3}$ | 246.70     | 0.55         |

862

863 **Table 5** Remanent magnetization ( $M_{rs}$ ), saturation magnetization ( $M_s$ ), coercivity ( $H_c$ ) and  $M_{rs}/M_s$   
864 ratios of whole mutant cells recovered after cultures. Additional wild-type cultures were used as a  
865 control condition.  
866

| Time of culture (h) | $M_{rs}$ (emu)        | $M_s$ (emu)           | $H_c$ (Oe) | $M_{rs}/M_s$ |
|---------------------|-----------------------|-----------------------|------------|--------------|
| <b>Wild-type</b>    |                       |                       |            |              |
| 43 #1               | $9.07 \times 10^{-4}$ | $2.29 \times 10^{-3}$ | 128.62     | 0.40         |
| 43 #2               | $8.06 \times 10^{-4}$ | $1.64 \times 10^{-3}$ | 274.89     | 0.49         |
| 43 #3               | $1.98 \times 10^{-3}$ | $4.09 \times 10^{-3}$ | 197.03     | 0.49         |
| <b><i>ΔmamP</i></b> |                       |                       |            |              |
| 43 #1               | $6.92 \times 10^{-5}$ | $2.09 \times 10^{-4}$ | 64.10      | 0.33         |
| 43 #2               | $2.89 \times 10^{-5}$ | $8.40 \times 10^{-5}$ | 52.29      | 0.34         |
| 43 #3               | $1.94 \times 10^{-5}$ | $5.56 \times 10^{-5}$ | 44.71      | 0.35         |
| <b><i>ΔmamT</i></b> |                       |                       |            |              |
| 43 #1               | 0                     | $3.32 \times 10^{-5}$ | 0          | 0            |
| 43 #2               | $3.58 \times 10^{-6}$ | $3.85 \times 10^{-5}$ | 0          | 0.09         |
| 43 #3               | -                     | -                     | -          | -            |

867
